## The Disease-Associated Proteins *Drosophila* Nab2 and Ataxin-2 Interact with Shared RNAs and Coregulate Neuronal Morphology

J. Christopher Rounds\*, Edwin B. Corgiat\*, Changtian Ye\*, Joseph A. Behnke\*, Seth M. Kelly<sup>‡</sup>, Anita H. Corbett<sup>†1</sup>, Kenneth H. Moberg\*<sup>1,2</sup>

\*Department of Cell Biology, Emory University School of Medicine, Atlanta, GA 30322;

<sup>†</sup>Department of Biology, Emory University, Atlanta, GA 30322;

<sup>‡</sup>Department of Biology, The College of Wooster, Wooster, OH 44691

<sup>1</sup>Co-corresponding authors

### For correspondence:

<sup>2</sup> Kenneth H. Moberg

Department of Cell Biology, Emory University School of Medicine  
615 Michael St.

Whitehead Biomedical Research Building, Room 442

Atlanta, GA 30322

Phone: 404-727-3733

Email: [koberg@emory.edu](mailto:koberg@emory.edu)

**Running head:** Nab2 and Atx2 share RNAs and functions

1 **ABSTRACT**

2 *Nab2* encodes a conserved polyadenosine RNA-binding protein (RBP) with broad roles in post-  
3 transcriptional regulation, including in poly(A) RNA export, poly(A) tail length control, transcription  
4 termination, and mRNA splicing. Mutation of the *Nab2* human ortholog *ZC3H14* gives rise to an  
5 autosomal recessive intellectual disability, but understanding of *Nab2/ZC3H14* function in metazoan  
6 nervous systems is limited, in part because no comprehensive identification of metazoan *Nab2/ZC3H14*-  
7 associated RNA transcripts has yet been conducted. Moreover, many *Nab2/ZC3H14* functional protein  
8 partnerships likely remain unidentified. Here we present evidence that *Drosophila melanogaster* *Nab2*  
9 interacts with the RBP Ataxin-2 (*Atx2*), a neuronal translational regulator, and implicate these proteins  
10 in coordinate regulation of neuronal morphology and adult viability. We then present the first high-  
11 throughput identifications of *Nab2*- and *Atx2*-associated RNAs in *Drosophila* brain neurons using an  
12 RNA immunoprecipitation-sequencing (RIP-Seq) approach. Critically, the RNA interactomes of each  
13 RBP overlap, and *Nab2* exhibits high specificity in its RNA associations in neurons *in vivo*, associating  
14 with a small fraction of all polyadenylated RNAs. The identities of shared associated transcripts (e.g.  
15 *drk*, *me31B*, *stai*) and of transcripts specific to *Nab2* or *Atx2* (e.g. *Arpc2*, *tea*, respectively) promise  
16 insight into neuronal functions of and interactions between each RBP. Significantly, *Nab2*-associated  
17 RNAs are overrepresented for internal A-rich motifs, suggesting these sequences may partially mediate  
18 *Nab2* target selection. Taken together, these data demonstrate that *Nab2* opposingly regulates neuronal  
19 morphology and shares associated neuronal RNAs with *Atx2*, and that *Drosophila* *Nab2* associates with  
20 a more specific subset of polyadenylated mRNAs than its polyadenosine affinity alone may suggest.

## 22 **Introduction**

23 Intellectual disability refers to a broad group of neurodevelopmental disorders affecting approximately  
24 1% of the world population (Maulik *et al.* 2011) and defined by significant limitations in intellectual  
25 functioning and adaptive behavior (Tassé *et al.* 2016; Vissers *et al.* 2016). Intellectual disabilities are  
26 etiologically diverse and in some cases genetically complex, yet many exhibit overlapping molecular  
27 dysfunctions in a comparatively limited set of fundamental neurodevelopmental pathways (reviewed in  
28 Chelly *et al.* 2006; van Bokhoven 2011; and Verma *et al.* 2019). Thus, monogenic intellectual  
29 disabilities represent experimentally tractable avenues for understanding both these disorders more  
30 broadly and neurodevelopment in general (Najmabadi *et al.* 2011; Agha *et al.* 2014). One set of such  
31 informative monogenic intellectual disabilities is caused by mutations affecting genes encoding RNA-  
32 binding proteins (RBPs) (reviewed in Bardoni *et al.* 2012) such as *ZC3H14* (*zinc finger CCCH-type*  
33 *containing 14*). Specifically, loss-of-function mutations in *ZC3H14*, which encodes a ubiquitously  
34 expressed polyadenosine RBP, cause a non-syndromic form of autosomal recessive intellectual  
35 disability (Pak *et al.* 2011; Al-Nabhani *et al.* 2018). However, the molecular functions and  
36 developmental roles of human *ZC3H14* are largely unknown; defining these functions and roles  
37 provides an opportunity to better understand intellectual disability and human neurodevelopment.

38 *Drosophila melanogaster* has proven a powerful model system to understand the molecular  
39 functions of proteins encoded by many intellectual disability genes (Inlow and Restifo 2004; Oortveld *et*  
40 *al.* 2013), and *ZC3H14* is no exception—its functions have begun to be dissected in part through study  
41 of its *Drosophila* ortholog *Nab2* (Pak *et al.* 2011; Kelly *et al.* 2014). *Drosophila* *Nab2*, like *ZC3H14*, is  
42 a polyadenosine RNA-binding protein that induces neurological defects when its expression is altered;  
43 deletion or overexpression of *Nab2* causes neuronal morphological defects in the eye, axon projection  
44 defects in the developing brain, and memory impairments (Pak *et al.* 2011; Kelly *et al.* 2016;

45 Bienkowski *et al.* 2017; Corgiat *et al.* 2020). The function of Nab2 is particularly important in  
46 *Drosophila* neurons, as pan-neuronal expression of Nab2 or an isoform of human ZC3H14 is sufficient  
47 to rescue the severe limitation in adult viability and locomotor defects caused by zygotic Nab2  
48 deficiency (Pak *et al.* 2011; Kelly *et al.* 2014). Crucially, Nab2 physically and functionally interacts  
49 with Fmr1, the *Drosophila* homolog of the Fragile X Syndrome RBP FMRP (Verkerk *et al.* 1991;  
50 Ashley *et al.* 1993; Wan *et al.* 2000), to support axonal morphology and olfactory memory (Bienkowski  
51 *et al.* 2017). Previous data suggest functions of *Drosophila* Nab2 in poly(A) tail length control,  
52 translational regulation, and mRNA splicing, but mechanistic demonstrations of its molecular function  
53 on individual, endogenous transcripts have yet to emerge (Pak *et al.* 2011; Kelly *et al.* 2014; Bienkowski  
54 *et al.* 2017; Jalloh *et al.* 2020). Such demonstrations have been prevented in large part because very few  
55 *Drosophila* Nab2-associated RNAs have been identified (Bienkowski *et al.* 2017; Jalloh *et al.* 2020),  
56 and a comprehensive accounting of Nab2-associated RNAs has yet to be conducted.

57 While the precise molecular function of *Drosophila* Nab2 on its associated transcripts is  
58 unknown, informed hypotheses may be drawn by synthesizing research on *Drosophila* Nab2 and  
59 orthologs murine ZC3H14, human ZC3H14, and *S. cerevisiae* Nab2, the most well-studied  
60 Nab2/ZC3H14 ortholog (reviewed in Fasken *et al.* 2019). In *S. cerevisiae*, Nab2 functions pervasively  
61 across many RNAs in transcript stability and transcription termination, and it likely acts similarly  
62 broadly in poly(A) tail length control and poly(A) RNA export (Schmid *et al.* 2015; Fasken *et al.* 2019;  
63 Alpert *et al.* 2020). Mutation of *S. cerevisiae* Nab2 induces dramatic increases in bulk poly(A) tail  
64 length and disrupts bulk poly(A) export from the nucleus (Green *et al.* 2002; Kelly *et al.* 2010).  
65 Consistent with its pervasive effects on many transcripts, *S. cerevisiae* Nab2 exhibits a broad binding  
66 target profile and is essential for cellular viability (Anderson *et al.* 1993; Tuck and Tollervey 2013). By  
67 contrast, mutant analyses of metazoan Nab2/ZC3H14 imply increased RNA target specificity for these

68 proteins. Unlike Nab2 in *S. cerevisiae*, full-length ZC3H14 in mice and humans is not essential for  
69 viability—instead, loss of ZC3H14 decreases viability in mice and causes neurological or  
70 neurodevelopmental defects in both organisms (Pak *et al.* 2011; Rha *et al.* 2017b; Al-Nabhani *et al.*  
71 2018). Bulk poly(A) tail lengths increase upon Nab2 loss in *Drosophila* or full-length ZC3H14 loss in  
72 mice *in vivo*, but this increase is not observed across all mouse tissues or all individual *Drosophila*  
73 mRNAs tested, and it is less pronounced than the effects observed in *S. cerevisiae* (Kelly *et al.* 2010;  
74 Bienkowski *et al.* 2017; Rha *et al.* 2017b). Moreover, in *Drosophila* and mouse cells, respectively, a  
75 pervasive nuclear poly(A) export defect is not observed upon Nab2 loss or ZC3H14 knockdown (Farny  
76 *et al.* 2008; Pak *et al.* 2011; Kelly *et al.* 2014). *Drosophila* Nab2 is required for proper splicing of  
77 individual introns and exons, but in a small, specific set of transcripts, including *Sex lethal* (Jalloh *et al.*  
78 2020). Taken together, these data are consistent with a focused role for *Drosophila* Nab2 in regulating  
79 poly(A) tail length, splicing, stability, and nuclear export crucial for certain transcripts, cell types, and  
80 developmental contexts (Bienkowski *et al.* 2017; Rha *et al.* 2017b; Jalloh *et al.* 2020). Crucially  
81 however, the theme of *Drosophila* Nab2 RNA target specificity implied by these data has not been  
82 tested and remains an important open question, especially as the polyadenosine affinity of *Drosophila*  
83 Nab2 (Pak *et al.* 2011) makes it theoretically capable of associating with all polyadenylated transcripts  
84 through their poly(A) tails. Thus, a comprehensive identification of *Drosophila* Nab2-associated RNAs  
85 is necessary to determine the potential scope of Nab2 function and provide sets of transcripts on which  
86 the molecular consequences of Nab2-RNA association may be systematically evaluated. In the present  
87 study, in response we define the first neuronal RNA interactome for Nab2.

88 Contextualizing Nab2-RNA associations requires further definition of the molecular pathways  
89 and proteins, particularly other RBPs, that Nab2 interacts with or regulates. Notably, the *Nab2* modifier  
90 eye screen that initially linked Nab2 and Fmr1 (Bienkowski *et al.* 2017) also recovered an allele of

91 *Ataxin-2 (Atx2)*, which encodes a conserved RBP and regulatory partner of *Fmr1* in *Drosophila* neurons  
92 (Sudhakaran *et al.* 2014; Jiménez-López and Guzmán 2014). The shared connection of *Nab2* and *Atx2*  
93 with *Fmr1* raised the possibility of cooperation or competition between these two proteins. Underscoring  
94 the value of this approach, *Atx2* is a protein of particular importance for human health and neuronal  
95 function. Expansion of a polyglutamine tract within *ATXN2*, the human *Atx2* ortholog, gives rise to the  
96 autosomal dominant neurodegenerative disease spinocerebellar ataxia type 2 (SCA2) (Imbert *et al.*  
97 1996; Pulst *et al.* 1996; Sanpei *et al.* 1996). Expansions of the same tract are also associated with  
98 parkinsonism and amyotrophic lateral sclerosis (ALS) (Gwinn-Hardy *et al.* 2000; Elden *et al.* 2010; Park  
99 *et al.* 2015). Functionally, *Atx2* encodes a conserved RNA-binding protein that regulates protein  
100 translation, mRNA stability, and mRNP granule formation and plays roles in memory, cellular  
101 metabolism, and circadian rhythms (reviewed in Ostrowski *et al.* 2017; Lee *et al.* 2018). Among the  
102 most well-studied molecular roles of *Atx2* are its contributions to regulation of mRNA translation in the  
103 cytoplasm. Specifically, *Atx2* suppresses the translation of some target RNAs through RNP granule  
104 formation and interactions with the RNAi machinery (McCann *et al.* 2011; Sudhakaran *et al.* 2014;  
105 Bakthavachalu *et al.* 2018) and supports the translation of other targets by promoting RNA  
106 circularization (Lim and Allada 2013; Zhang *et al.* 2013; Lee *et al.* 2017). Intriguingly *Atx2*, like *Nab2*,  
107 contributes to poly(A) tail length control in *S. cerevisiae*—the yeast *Atx2* ortholog *Pbp1* promotes  
108 poly(A) tail length, likely by inhibiting the activity of poly(A) nuclease (PAN) (Mangus *et al.* 1998,  
109 2004). The shared connections of *Nab2* and *Atx2* to *Fmr1*, neuronal translation, and poly(A) tail length  
110 control emphasize the potential for and need to test whether these RBPs functionally interact beyond the  
111 initial eye screen link.

112 Here, after expanding the genetic link previously identified between *Nab2* and *Atx2* in our  
113 modifier screen, we used genetic and molecular approaches to probe the functional connections between

114 these two RBPs. We show that Nab2 and Atx2 functionally interact to control neuronal morphology of  
115 the mushroom bodies (MBs), a learning and memory center of the *Drosophila* brain (Heisenberg 2003;  
116 Kahsai and Zars 2011; Yagi *et al.* 2016; Takemura *et al.* 2017). We then present the first high-  
117 throughput identification of Nab2- and Atx2-associated RNAs in *Drosophila*; in fact, such accounting  
118 has been performed for Nab2 only in *S. cerevisiae*, not in any metazoan (Guisbert *et al.* 2005; Batisse *et*  
119 *al.* 2009; Tuck and Tollervey 2013; Baejen *et al.* 2014). This approach demonstrates Nab2 and Atx2  
120 associate with an overlapping set of RNA transcripts in fly brains and provides insight into the functions  
121 of each protein individually and in concert with one another. Considering these data as a whole, we  
122 propose a model in which the genetic interactions between Nab2 and Atx2 are explained by their  
123 counterbalanced regulation of shared associated RNAs. Our data represent a valuable resource for  
124 understanding the neuronal roles of Nab2 and Atx2 in *Drosophila* and, potentially, for understanding  
125 links between each RBP and human disease.

126

## 127 **Materials and Methods**

### 128 ***Drosophila* genetics and husbandry**

129 Genetic crosses of *Drosophila melanogaster* were raised on standard media and maintained at 25°C in  
130 humidified incubators (SRI20PF, Shel Lab) with 12-hour light-dark cycles unless otherwise specified.  
131 Cultures were often supplemented with granular yeast (Red Star Yeast) to encourage egg laying.  
132 Parental stocks were maintained at either at room temperature (RT) or 18°C to control virgin eclosion  
133 timing. Stocks used include *Nab2<sup>ex3</sup>* (a *Nab2* null), *Nab2<sup>pex41</sup>* (a P-element excision control serving as a  
134 *Nab2* wild type), and *UAS>Nab2-FLAG*, all first described in (Pak *et al.* 2011). Additional stocks used  
135 include *GMR-Gal4* (on chromosome 2), *Atx2<sup>XI</sup>* (an *Atx2* null, gift of N. Bonini) (Satterfield *et al.* 2002),  
136 and *UAS>Atx2-3xFLAG* (gift of R. Allada) (Lim and Allada 2013). Finally, stocks sourced from the

137 Bloomington Drosophila Stock Center (BDSC) include: *elav>Gal4* (*elav*<sup>*c155*</sup>, BL458) (Lin and  
138 Goodman 1994), *OK107-Gal4* (BL854) (Connolly *et al.* 1996), *Df(3R)Exel6174* (BL7653) (Parks *et al.*  
139 2004), *UAS>Nab2* (*Nab2*<sup>*EP3716*</sup>, BL17159) (Rørth *et al.* 1998; Bellen *et al.* 2004), and *Atx2*<sup>*DG08112*</sup>. The  
140 *Atx2*<sup>*DG08112*</sup> stock (Huet *et al.* 2002) was mapped as part of the Gene Disruption Project (GDP) (Bellen *et*  
141 *al.* 2004) and is no longer available from the BDSC; copies provided upon request.

## 142 ***Drosophila* eye imaging**

143 *Drosophila* eyes were imaged using a Leica MC170 HD digital camera mounted on a Nikon SMZ800N  
144 stereo microscope at 8X magnification. To prepare subjects for imaging, flies were flash frozen (−80°C,  
145 1 minute), fixed in place on a clear Slygard pad using minutien pins (26002-10, Fine Science Tools), and  
146 submerged in 70% ethanol to diffuse light and reduce glare. Subjects were illuminated with a fiber optic  
147 ring light (Dolan-Jenner) and LED illuminator (Nikon Instruments Inc.) and image acquisition was  
148 performed using the Leica Application Suite (v4.12) for Windows under the following parameters: 140  
149 ms exposure; automatic white balance; highest available resolution; and default values for gain,  
150 saturation, gamma, and hue. Each subject was imaged at multiple focal planes (often ≥ 10), and these  
151 were subsequently combined using the *Auto-Align* and *Auto-Blend* functions in Photoshop CS5.1  
152 Extended (Adobe) to generate final, merged images in which the entire subject is in-focus. These “focus  
153 stacking” processing steps (Patterson) combine only in-focus regions of an image series into a single,  
154 merged image.

## 155 **Immunofluorescence**

156 For mushroom body morphology experiments, *Drosophila* brains were dissected using methods similar  
157 to those in (Williamson and Hiesinger 2010; Kelly *et al.* 2016, 2017). Briefly, using #5 Dumont fine  
158 forceps (Ted Pella, Inc.), for each dissection a *Drosophila* head was isolated in PBS (often supplemented  
159 with 0.1% Triton X-100), the proboscis was removed to provide a forceps grip point, and the remaining



160 cuticle and trachea were peeled away from the brain within. On wet ice, dissected brains were fixed in  
161 4% paraformaldehyde for 30 minutes and then permeabilized in 0.3% PBS-Triton (PBS-T) for 20  
162 minutes. For both primary and secondary antibody incubations, brains were left rocking at 4°C for 1-3  
163 nights in 0.1% PBS-T supplemented with blocking agent normal goat serum (Jackson ImmunoResearch)  
164 at a 1:20 dilution. Immunostained brains were mounted on SuperFrost Plus slides (12-550-15, Fisher  
165 Scientific) in Vectashield (H-1000, Vector Laboratories) using a cover slip “bridge” method (Kelly *et al.*  
166 2017). Brains were imaged on a Zeiss LSM 510 confocal microscope. Exclusively female flies were  
167 dissected for practicality, given that *Nab2<sup>ex3</sup>* nulls were analyzed in this experiment and *Nab2<sup>ex3</sup>* adult  
168 viability skews towards females (Jalloh *et al.* 2020).

169 For Nab2-Atx2 localization experiments, whole animals were fixed in 4% paraformaldehyde,  
170 0.008% PBS-T, shaking, for 3 hours at RT and then washed in PBS and stored at 4°C overnight. Brains  
171 were dissected in 0.008% PBS-T using similar methods as described above, permeabilized by shaking in  
172 0.5% PBS-T overnight at 4°C, and blocked by shaking in 0.5% PBS-T, 5% NGS for 2 hours at RT. For  
173 both primary and secondary antibody/Hoechst incubations, brains were left shaking at 4°C for 2-3 nights  
174 in 0.5% PBS-T, 5% NGS. After washing with 0.5% PBS-T followed by PBS, brains were mounted in  
175 SlowFade Gold Antifade Mountant (S36936, Invitrogen), surrounded by an adhesive imaging spacer  
176 (GBL654002, Sigma-Aldrich) to prevent sample compression, and finally cover-slipped and sealed with  
177 clear nail polish. Brains were imaged on an A1R HD25 confocal microscope (Nikon) and a multi-photon  
178 FV1000 laser-scanning microscope (Olympus).

179 Primary antibodies and dilutions used are as follows: mouse  $\alpha$ -Fasciclin 2 (1:50) (1D4,  
180 Developmental Studies Hybridoma Bank), rabbit  $\alpha$ -GFP (1:400) (A11122, Invitrogen), and mouse  $\alpha$ -  
181 FLAG (1:500) (F1804, Sigma-Aldrich). Secondary antibodies and dilutions used are as follows: goat  $\alpha$ -  
182 mouse Cy3 (1:100) (Jackson ImmunoResearch), goat  $\alpha$ -mouse Alexa 594 (1:400) (A11032, Invitrogen)

183 and goat  $\alpha$ -rabbit Alexa 488 (1:400) (A11008, Invitrogen). To fluoresce DNA and mark nuclei in  
184 localization experiments, brains were also incubated with a Hoechst 33342 stain (1:1,000) (H21492,  
185 Invitrogen) during secondary antibody incubation.

186 Further brain image analysis and processing, including generating maximum intensity  
187 projections and focus stacks and adjusting brightness and contrast, was performed with Photoshop  
188 CS5.1 Extended (Adobe) and Fiji (Schindelin *et al.* 2012), a distribution of ImageJ (Schneider *et al.*  
189 2012; Rueden *et al.* 2017).

### 190 **Immunoprecipitation**

191 This immunoprecipitation protocol was developed through optimization guided by the protocols  
192 presented in (Yang *et al.* 2005; Banerjee *et al.* 2017; Bienkowski *et al.* 2017; Morris and Corbett 2018).  
193 Nuclear Isolation Buffer (NIB; 10 mM Tris HCl pH 7.4, 10 mM NaCl, 3 mM MgCl<sub>2</sub>, 0.5% NP-40) and  
194 Immunoprecipitation Buffer (IP Buffer; 50 mM HEPES, 150 mM NaCl, 5 mM EDTA, 0.1% NP-40)  
195 were prepared ahead of the experiment and stored indefinitely at 4°C. Both buffers, and the glycine and  
196 PBS solutions below, were prepared primarily in 0.1% diethyl pyrocarbonate (DEPC)-treated and  
197 autoclaved ultrapure Milli-Q water to limit RNase contamination. Both NIB and IP Buffer were  
198 supplemented with an EDTA-free cOmplete protease inhibitor cocktail tablet (1 tablet/28 ml;  
199 11873580001, Roche) and RNasin Plus RNase inhibitor (0.2%; N2615, Promega) freshly before each  
200 experiment. Additionally, before each experiment Protein G-coupled magnetic Dynabeads (10003D,  
201 Thermo Fisher) were conjugated to glycerol-free (Domanski *et al.* 2012) monoclonal  $\alpha$ -FLAG (F3165,  
202 Sigma-Aldrich) in aliquots of 1.5 mg beads/9  $\mu$ g antibody by incubation for 45 minutes at room  
203 temperature. Throughout the experiment, beads were magnetized using DynaMag-Spin magnets (e.g.  
204 12320D, Thermo Fisher) as necessary. Exclusively female flies were used for consistency with MB  
205 experiments and for practicality, as both *elav>Nab2-FLAG* and *elav>Atx2-3xFLAG* prohibitively

206 decreased relative male viability (data not shown), presumably due to deleterious effects in males likely  
207 driven by dosage compensation of the X-chromosome-linked *elav>Gal4* construct leading to enhanced  
208 epitope-tagged protein overexpression.

209         300 female *Drosophila* heads each of the genotypes *elav>Gal4* alone, *elav>Nab2-FLAG*, and  
210 *elav>Atx2-3xFLAG*, previously isolated in bulk (see *Supplemental Materials and Methods*), were fixed  
211 in 1% formaldehyde, 0.1% NP-40 in PBS for 30 minutes at 4°C. Fixation was quenched by adding  
212 glycine to a final concentration of 250 mM and rocking for 10 minutes at 4°C. Heads were washed in  
213 0.1% NP-40 in PBS and then manually homogenized with a smooth Teflon pestle for 5 minutes in 250  
214 µL of NIB in a size AA glass tissue grinder at 4°C (3431D70, Thomas Scientific). Homogenates were  
215 spun through 35 µm cell strainer caps into round-bottom tubes (352235, Falcon) to remove exoskeletal  
216 debris, transferred, and then centrifuged for 5 minutes at 500×g at 4°C to separate an insoluble fraction.  
217 Twenty percent of the soluble supernatant volume was isolated and defined as Input; the remaining  
218 eighty percent was used for immunoprecipitation. Both Input and IP samples were diluted to final  
219 concentrations of 0.8x IP Buffer to ensure comparable and efficient sample lysis. IP samples were  
220 transferred onto the α-FLAG-conjugated magnetic Dynabeads, and both sample types were incubated,  
221 rotating, for 10 minutes at room temperature. Next, IP sample supernatant was collected as the Unbound  
222 fraction, and IP sample beads were washed three times in IP Buffer. Finally, IP sample beads were  
223 resuspended in IP Buffer, transferred to clean tubes, and stored along with Input samples overnight at  
224 4°C to allow passive hydrolysis to partially reverse formaldehyde crosslinks. This protocol was applied  
225 for both protein co-immunoprecipitation and RNA immunoprecipitation.

226         For protein co-immunoprecipitation, harsh elution of protein from IP sample beads was  
227 accomplished the next day—IP samples were diluted in modified Laemmli Sample Buffer (Laemmli  
228 1970), incubated at 98°C for 5 minutes, centrifuged at 16,100×g for 5 minutes at room temperature, and

229 magnetized to collect beads. Sample supernatants were then collected as IP samples. In parallel, Input  
230 samples were concentrated using an acetone-based method; this step was required for subsequent  
231 immunoblot analysis. Input samples were diluted to generate 80% chilled acetone solutions, vortexed for  
232 15 seconds, and incubated at  $-20^{\circ}\text{C}$  for 60 minutes. Samples were centrifuged at  $14,000\times g$  for 10  
233 minutes at room temperature, resulting supernatants were discarded, and most remaining acetone was  
234 evaporated by air drying protein pellets in open tubes for 30 seconds at room temperature. To solubilize  
235 these dried protein pellets, samples were suspended in a solution equal parts modified Laemmli Sample  
236 Buffer (Laemmli 1970) and IP Buffer, vortexed, sonicated for 3x5 minutes in a  $4^{\circ}\text{C}$  Bioruptor  
237 ultrasonicator (UCD-200, Diagenode), vortexed, and heated at  $98^{\circ}\text{C}$  for 10 minutes. Finally, remaining  
238 insoluble material was collected by centrifugation at  $16,100\times g$  for 5 minutes at room temperature.  
239 Associated supernatants were isolated as concentrated Input protein samples. For RNA  
240 immunoprecipitation, harsh elution of RNA from IP sample beads was accomplished the next day with  
241 Trizol—both IP and Input samples were subjected to the RNA extraction protocol detailed below.

#### 242 **RNA Extraction**

243 Following immunoprecipitation, RNA was isolated from IP and Input samples using a TRIzol-column  
244 hybrid approach adapted from (Rodriguez-Lanetty). To account for volume differences, samples were  
245 vigorously homogenized in TRIzol reagent (15596018, Thermo Fisher) at a ratio of either 1:10 (IP  
246 sample:TRIZol) or 1:3 (Input sample:TRIZol) and then incubated for 5 minutes at room temperature. All  
247 homogenized samples were clarified by centrifugation at  $12,000\times g$  at  $4^{\circ}\text{C}$  for 5 minutes, IP samples  
248 were magnetized to collect beads, and supernatant was isolated from all samples. After adding  
249 chloroform at a ratio of 0.2:1 (chloroform:TRIZol), samples were manually shaken and incubated at  
250 room temperature for 3 minutes. Samples were phase separated by centrifugation at  $12,000\times g$  at  $4^{\circ}\text{C}$  for  
251 15 minutes, after which the aqueous layer was carefully isolated and mixed with an equal volume of

252 100% ethanol. RNA was further purified using an RNeasy Mini Kit (74106, QIAGEN) according to the  
253 manufacturer's instructions (RNeasy Mini Handbook, 4<sup>th</sup> Ed., June 2012) with the following deviations:  
254 for each sample, a final 30  $\mu$ L elution was performed twice, isolating 60  $\mu$ L of RNA in total into each  
255 collection tube. An on-column DNase digestion step was also performed under the same instructions  
256 using an RNase-Free DNase Set (79254, QIAGEN). Final RNA concentration and sample purity were  
257 determined via a NanoDrop 1000 spectrophotometer (Thermo Fisher).

### 258 **RNA Sequencing**

259 RNA from twelve samples of 300 adult female *Drosophila* heads each was isolated via the  
260 immunoprecipitation and extraction protocols described above, generating twelve pairs of IP and Input  
261 samples, or twenty-four samples in total. These samples were composed of four biological replicates  
262 each of *elav>Gal4* alone, *elav>Nab2-FLAG*, and *elav>Atx2-3xFLAG*. Once obtained, RNA samples  
263 were transferred on dry ice to the Georgia Genomics and Bioinformatics Core at UGA for library  
264 preparation and sequencing. There, IP samples were first concentrated using solid phase reversible  
265 immobilization (SPRI) beads. Then, the TruSeq Stranded Total RNA Library Prep Gold kit (20020598,  
266 Illumina) was used to deplete rRNA and prepare stranded cDNA libraries from all twenty-four samples.  
267 These uniquely barcoded cDNA libraries were then pooled by sample type, forming one IP library pool  
268 and one Input library pool. Each pool was sequenced on a separate NextSeq High Output Flow Cell  
269 (Illumina) for 150 cycles to generate paired-end, 75 base-pair (bp) reads. Total non-index sequencing  
270 yield across all IP samples was 88.49 Gbp, equivalent to about 1.2 billion reads in total and 98 million  
271 reads per sample. Total non-index sequencing yield across all Input samples was 83.25 Gbp, equivalent  
272 to about 1.1 billion reads in total and 93 million reads per sample. Sequencing accuracy was high;  
273 87.83% and 91.38% of non-index reads for IP and Input samples, respectively, have a sequencing  
274 quality (Q) score greater than or equal to 30.

275 **RNA Sequencing Analysis—Read Mapping, Differential Expression, Visualization**

276 Following sequencing, raw read FASTA files were transferred to Emory for bioinformatic analysis. To  
277 start, analyses were conducted on the Galaxy web platform, specifically using the public server at  
278 usegalaxy.org (Afgan *et al.* 2018). This analysis was supported by the BDGP6.22 release of the  
279 *Drosophila melanogaster* genome (Hoskins *et al.* 2015)—both the raw sequence FASTA and the gene  
280 annotation GTF were downloaded from release 97 of the Ensembl database (Yates *et al.* 2020) and used  
281 as inputs in subsequent read mapping, annotation, and visualization steps. For each Galaxy tool  
282 described below, exact parameters and version numbers used are detailed in Supplemental Table 1. For  
283 each sample, reads from across all four NextSeq flow cell lanes were concatenated using the Galaxy  
284 *Concatenate datasets tail-to-head* tool and mapped using RNA STAR (Dobin *et al.* 2013). Mapped  
285 reads were then assigned to exons/genes and tallied using *featureCounts* (Liao *et al.* 2014). To enable  
286 inter-sample read count comparisons, count normalization and differential expression analysis was  
287 conducted using *DESeq2* (Love *et al.* 2014). Importantly, *DESeq2* analysis was performed twice, once  
288 on the 12 IP samples and once on the 12 Input samples; see *Supplemental Materials and Methods* for  
289 discussion of this sample separation method.

290 Outputs from all of the above tools were downloaded from Galaxy for local analysis,  
291 computation, and visualization. Custom R scripts were written to generate the scatterplots and  
292 hypergeometric test reported here and are available in File S3. Scripts in the R programming language  
293 (R Core Team 2019) were written and compiled in RStudio (R Studio Team 2018). Additional R  
294 packages used in these scripts include *ggplot2* (Wickham 2016), *ggrepel* (Slowikowski 2019),  
295 *BiocManager* (Morgan 2018), and *DESeq2* (Love *et al.* 2014). Analyses were supported by bulk data  
296 downloads along with extensive gene-level annotation, sequence information, and references provided  
297 by Flybase (Thurmond *et al.* 2018). Principal component analysis was conducted by and reported from

298 the above *DESeq2* assessment on Galaxy. Mapped reads were visualized in the Integrative Genomics  
299 Viewer (IGV) (Robinson *et al.* 2011) on the same version of the *D. melanogaster* genome used above.

300 **Gene-by-gene one-way ANOVAs to identify significantly enriched (i.e. RBP-associated)**  
301 **transcripts**

302 Gene-by-gene ANOVAs and post-hoc tests for the 5,760 genes identified in the “testable” set, along  
303 with bar graphs of IP/Input values, were generated in Prism 8 for Windows 64-bit (GraphPad Software).  
304 Custom R and PRISM scripts were written to generate and label the 5,760 PRISM data tables, one per  
305 testable gene, required for this analysis, and custom R scripts were written to extract and combine the  
306 outputs from each test; these scripts are all available in File S3. See *Results* for a summary and below for  
307 a further detailed discussion of the statistical testing used to define the testable transcript set and identify  
308 significantly enriched (i.e. RBP-associated) transcripts in our RIP-Seq results.

309 To identify RNA targets of Nab2 and Atx2—that is, RNAs enriched in either Nab2 RIP or Atx2  
310 RIP samples relative to control RIP—directly comparing normalized read counts between RIP samples  
311 is insufficient. Differences in RNA expression between samples must be accounted for, as these  
312 differences can partially or wholly explain differences in the amount of RNA isolated by IP. We  
313 employed a common solution to this problem used in RIP- and ChIP-qPCR (Zhao *et al.* 2010; Aguilo *et*  
314 *al.* 2015; Li *et al.* 2019), scaling normalized RIP reads for each gene in each sample by the  
315 corresponding number of normalized Input reads. For clarity, we describe these values as “IP/Input”—  
316 they are commonly referred to as “Percent Input” or “% Input.” These IP/Input values could then be  
317 compared between samples, further normalizing them to *elav-Gal4* alone controls. In this way, RIP fold  
318 enrichment, appropriately normalized to library size/composition *and* gene expression, were calculated  
319 for each gene in each sample. To promote the reliability of our analyses and increase our statistical  
320 power to detect differences in fold enrichment, we limited further analyses to a testable set of 5,760

321 genes out of the 17,753 total genes annotated in the BDGP6.22 genome. The testable gene set was  
322 defined as having detectable expression in all twelve Input samples and an average normalized read  
323 count in either Nab2 or Atx2 RIP samples greater than 10. These criteria were based on those used in  
324 (Lu *et al.* 2014; Malmevik *et al.* 2015). In this defined gene set, differences in fold enrichment were  
325 statistically tested using gene-by-gene one-way ANOVAs (Li *et al.* 2019) in Prism 8 (GraphPad  
326 software), applying Dunnett's post-hoc test to calculate significance *p*-values only for the comparison of  
327 each experimental sample to the control sample (Dunnett 1955). In each case, *p*-values were adjusted to  
328 correct for multiple hypothesis testing only within each gene-by-gene ANOVA. We identified a small,  
329 focused set of statistically significantly enriched RNAs using this approach and concluded that  
330 additional corrections across all genes to control type I error (i.e. false positives) are not necessary  
331 (Rothman 1990). In fact, in the analyses above we determined that rRNA depletion during our RIP-Seq  
332 library preparation was incomplete, resulting in comparatively low read depth. Thus, rather than failing  
333 to adequately control type I error, we strongly suspect the RBP-associated transcripts we identified  
334 through this approach represent an undercount, to be expanded in future studies by methods with higher  
335 sensitivity (e.g. CLIP-Seq).

### 336 **RNA Sequencing Analysis—Sequence Motif Analyses**

337 Sequence motif analyses were conducted using the MEME Suite of software tools, accessed through the  
338 web interface at [meme-suite.org](http://meme-suite.org) (Bailey *et al.* 2009). For each MEME Suite tool described below, exact  
339 parameters and version numbers used are detailed in Supplemental Table 1. Within the MEME Suite, we  
340 used MEME itself (Bailey and Elkan 1994) to scan all Nab2-associated transcripts, regardless of their  
341 association with Atx2, to 1) identify sequence motifs shared across multiple transcripts and 2) evaluate  
342 the frequency and statistical significance of the discovered sequence motifs. Next, FIMO (Grant *et al.*  
343 2011) was used to quantify the frequency among 1) Nab2-associated transcripts and 2) non-Nab2



344 associated transcripts of user-provided sequences, specifically i) a 41-bp A-rich motif identified in  
345 Nab2-associated transcripts by MEME, ii) A<sub>12</sub>, and iii) A<sub>11</sub>G. Non-Nab2-associated transcripts are  
346 defined as all 5,619 transcripts in the testable set found to not be statistically significantly associated  
347 with Nab2 by RIP-Seq. Sequence logos (i.e. visual representations of weighted sequence motifs) were  
348 generated by MEME and by WebLogo 3.7.4, available at [weblogo.threeplusone.com](http://weblogo.threeplusone.com) (Crooks *et al.*  
349 2004).

350 Importantly, for any Nab2-associated or non-Nab2 associated transcripts annotated with multiple  
351 splice variants, all variant sequences were included as inputs in our motif analyses. This inclusion  
352 reflects an inherent limitation of standard shotgun—that is, short-read—sequencing, as most reads  
353 cannot be unambiguously assigned to one splice variant of a given gene, only to given exon(s) encoded  
354 by that gene. We therefore chose this inclusion strategy to avoid introducing any bias associated with  
355 attempting to call single splice variants for RBP association, and for analytical simplicity. Full  
356 sequences of Nab2-associated and non-Nab2 associated transcripts were obtained using the FlyBase  
357 Sequence Downloader at [flybase.org/download/sequence/batch/](http://flybase.org/download/sequence/batch/) (database release FB2020\_04).

### 358 **Data Availability**

359 The authors affirm that all data necessary for confirming the conclusions of the article are present within  
360 the article and associated figures, tables, supplemental materials, and database accessions. File S1  
361 contains *Supplemental Materials and Methods*, including those focused on bulk *Drosophila* head  
362 isolation, immunoblotting, *DESeq2*-based count normalization, and Gene Ontology analyses. File S2  
363 contains detailed legends for all supplemental tables. File S3 contains all custom code—both R and  
364 PRISM scripts—written to generate, analyze, or visualize data in this article and associated figures,  
365 tables, and supplemental materials. Sequencing data, including raw reads, processed counts, and  
366 statistical analyses for each individual RIP-Seq sample, are available at the Gene Expression Omnibus

367 (GEO) under accession: GSE165677. *Drosophila* stocks are available upon request. Supplemental  
368 materials, including files, figures, and tables, are available at figshare:  
369 <https://figshare.com/s/6f28676d7119624b3105>.

370

## 371 **Results**

### 372 ***Atx2* loss-of-function alleles suppress Nab2 overexpression phenotypes in the adult eye**

373 Previous work has established a Gal4-driven Nab2 overexpression system in the *Drosophila* eye as an  
374 effective screening platform to identify potential regulatory partners and targets of Nab2 (Pak *et al.*  
375 2011; Bienkowski *et al.* 2017; Lee *et al.* 2020). This approach uses the *Glass Multimer Reporter (GMR)*  
376 construct (Ellis *et al.* 1993; Hay *et al.* 1994) to drive expression of the *S. cerevisiae* Gal4 transcription  
377 factor in fated eye cells (Freeman 1996). In turn, Gal4 binds to *Upstream Activating Sequence (UAS)*  
378 sites within an EP-type P-element (Rørth 1996) inserted upstream of the endogenous *Nab2* gene  
379 (*EP3716*) and induces eye-specific overexpression of endogenous Nab2 protein (a genotype hereafter  
380 referred to as *GMR>Nab2*). *GMR>Nab2* produces a consistent array of eye morphological defects  
381 compared to the *GMR-Gal4* transgene control (Pak *et al.* 2011; Bienkowski *et al.* 2017; Lee *et al.* 2020)  
382 and (Figure 1A,B). Specifically, this misexpression causes loss of posterior eye pigment, sporadic  
383 blackened patches, and disruptions to ommatidial organization lending the surface of the eye a “rough”  
384 appearance. Notably, *GMR>Nab2*-induced pigment loss increases in severity along the anterior-to-  
385 posterior axis of the eye, likely because *GMR* activation occurs behind the morphogenetic furrow, the  
386 posterior-to-anterior wave of eye morphogenesis observed in the larval eye disc (Wolff and Ready 1991;  
387 Hay *et al.* 1994). As a result, posterior *GMR>Nab2* eye cells experience the longest period of Nab2  
388 overexpression.

389 Using the *GMR>Nab2* modifier screen as a foundation, we previously identified the *Drosophila*  
390 Fragile X Syndrome RBP and neuronal translational regulator Fmr1 as a physical and functional

391 interactor of Nab2 (Bienkowski *et al.* 2017). An allele of the *Ataxin-2* (*Atx2*) gene, which encodes an  
392 RNA binding protein that is a regulatory partner of Fmr1 in *Drosophila* (Sudhakaran *et al.* 2014), was  
393 also detected in eye this screen as a candidate *GMR>Nab2* modifier (Bienkowski *et al.* 2017). To pursue  
394 this potential Nab2-*Atx2* link, we tested two *Atx2* alleles for genetic interactions with *GMR>Nab2*. The  
395 first allele, *Atx2*<sup>DG08112</sup>, is caused by the insertion of a 15.6 kb *{wHy}* P-element near the 5' end of *Atx2*  
396 (Huet *et al.* 2002; Bellen *et al.* 2004) and is lethal *in trans* to *Df(3R)Exel6174*, a deletion that completely  
397 removes the *Atx2* locus and nearby genes (Parks *et al.* 2004). That is, crossing balanced *Atx2*<sup>DG08112</sup> and  
398 *Df(3R)Exel6174* alleles produces no *trans* heterozygotes among other F1 progeny (n=54). Based on  
399 these data, we interpret *Atx2*<sup>DG08112</sup> to be a strong hypomorph. The second *Atx2* allele, *Atx2*<sup>XI</sup>, is a 1.4 kb  
400 imprecise-excision-based deletion that removes the first 22 codons of the *Atx2* coding sequence and that  
401 has been characterized as a null (Satterfield *et al.* 2002). In part because Nab2 loss induces some sex-  
402 specific defects (Jalloh *et al.* 2020), we analyzed each sex individually. In adult females, heterozygosity  
403 for either of these two loss-of-function alleles, *Atx2*<sup>DG08112</sup> (Figure 1C) or *Atx2*<sup>XI</sup> (Figure 1D),  
404 dominantly suppresses the pigment loss and blackened patches caused by *GMR>Nab2*. In contrast, both  
405 *Atx2* alleles have limited impact on ommatidial organization or “roughness”. In males, *GMR>Nab2*  
406 induces morphological eye defects (Figure 1 E,F) comparable to those in females, and similarly  
407 heterozygosity for either *Atx2*<sup>DG08112</sup> (Figure 1G) or *Atx2*<sup>XI</sup> (Figure 1H) dominantly suppresses the  
408 pigment loss and blackened patch defects.

#### 409 ***Atx2* loss-of-function alleles suppress *Nab2* null effects on adult viability and brain morphology**

410 Misexpression of Nab2 induces dramatic phenotypes in domains beyond the eye; homozygosity for the  
411 null allele *Nab2*<sup>ex3</sup> causes a dramatic reduction in adult viability (Pak *et al.* 2011). Thus, to explore  
412 whether modifying effects of *Atx2* loss-of-function alleles extend to the endogenous *Nab2* locus, we  
413 analyzed the effect of *Atx2* heterozygosity on low adult viability in *Nab2*<sup>ex3</sup> homozygotes (Supplemental

414 Figure 1). As in the eye, both the  $Atx2^{DG08112}$  and  $Atx2^{XI}$  alleles dominantly suppress the viability defects  
415 observed in  $Nab2^{ex3}$  females, elevating adult viability from 17% to 39% and 82%, respectively (Figure  
416 1I). The corresponding effect in males is not as penetrant; only the null  $Atx2^{XI}$  allele dominantly  
417 suppresses the viability defect in  $Nab2^{ex3}$  males (Figure 1J). Taken together, these data establish gross  
418 similarities in  $Nab2$ - $Atx2$  genetic interactions in females and males. Thus, for practicality we focused  
419 further experiments exclusively on female flies, given the more prohibitive impact on male viability of  
420 changes in  $Nab2$  expression (Jalloh *et al.* 2020 and see *Materials and Methods*).

421 That  $Atx2$  loss-of-function alleles improve adult viability of  $Nab2^{ex3}$  homozygotes suggests  $Atx2$   
422 and  $Nab2$  coregulate processes or transcripts important for adult development or survival. However,  
423 these genetic interactions do not reveal in what cell types or tissues this coregulation may occur. We  
424 therefore focused further investigations of  $Nab2$ - $Atx2$  interaction in the brain, given the established and  
425 important roles of each protein in brain neurons (Lim and Allada 2013; Sudhakaran *et al.* 2014; Kelly *et al.*  
426 *al.* 2016; Bienkowski *et al.* 2017).  $Nab2^{ex3}$  homozygous flies develop morphological defects in the axon  
427 tracts—lobes—of the mushroom body (MB) brain structure, a principal olfactory learning and memory  
428 center of the insect brain (Heisenberg 2003; Kahsai and Zars 2011; Yagi *et al.* 2016; Takemura *et al.*  
429 2017). Specifically, the MBs of surviving  $Nab2^{ex3}$  homozygous null adults exhibit two highly penetrant  
430 structural defects: thinning or absence of the dorsally-projecting  $\alpha$  lobes and over-projection or “fusion”  
431 of the medially-projecting  $\beta$  lobes (Kelly *et al.* 2016). We found that heterozygosity for either  
432  $Atx2^{DG08112}$  or  $Atx2^{XI}$  also causes defects in MB morphology—specifically  $\beta$  lobe fusion—with no  
433 apparent effects on  $\alpha$  lobe morphology as compared to controls (Figure 2A-C). Importantly, in the  
434 background of  $Nab2^{ex3}$  nulls (Figure 2D), heterozygosity for either  $Atx2^{DG08112}$  (Figure 2E) or  $Atx2^{XI}$   
435 (Figure 2F) suppresses the thinning or absence of  $\alpha$  lobes, decreasing the penetrance of this phenotype  
436 from 62% of  $\alpha$  lobes to 30% or 36%, respectively (Figure 2G). In contrast, neither  $Atx2$  allele

437 significantly affects the penetrance of  $\beta$  lobe fusion in *Nab2<sup>ex3</sup>* nulls, demonstrating the effect of each  
438 mutation is not additive to the effect of *Nab2<sup>ex3</sup>* homozygosity in this context (Figure 2H). A similar  $\alpha$ -  
439 lobe-specific interaction occurs between alleles of *Nab2* and *Fmr1* (Bienkowski *et al.* 2017). Notably, as  
440  $\alpha$  and  $\beta$  lobes are composed of tracts of bifurcated axons from single cells (Takemura *et al.* 2017), this  
441  $\alpha$ -lobe-specific suppression by *Atx2* alleles demonstrates a *Nab2-Atx2* genetic interaction at subcellular  
442 resolution. Moreover, that *Atx2* loss-of-function alleles suppress defects of a *Nab2* null allele implies  
443 that *Atx2* and *Nab2* proteins may coregulate, but in opposing ways, pathways guiding  $\alpha$  lobe  
444 morphology during development.

#### 445 ***Nab2* and *Atx2* primarily localize to independent compartments in mushroom body neurons**

446 The genetic links between *Nab2* and *Atx2* could reflect a physical interaction between their encoded  
447 proteins (e.g. as shared components of mRNP complexes), as has been observed for both *Nab2* and *Atx2*  
448 with *Fmr1* (Sudhakaran *et al.* 2014; Bienkowski *et al.* 2017). Alternatively, these genetic links could  
449 reflect functional but not physical interactions between *Nab2* and *Atx2* on common RNAs or  
450 neurodevelopmental processes. The latter hypothesis aligns with the localization patterns of each  
451 protein—*Nab2* localizes primarily to neuronal nuclei with a small fraction in the cytoplasm in some  
452 contexts (Kelly *et al.* 2016; Bienkowski *et al.* 2017), while *Atx2* is exclusive to the neuronal cytoplasm  
453 except under certain pathogenic conditions (Lessing and Bonini 2008; Elden *et al.* 2010). To begin to  
454 differentiate between these hypotheses, we evaluated the localization profiles of each protein in MBs *in*  
455 *vivo*. We expressed both *UAS-Nab2-YFP* and *UAS-Atx2-3xFLAG* transgenes in adult MB Kenyon cells  
456 using the pan-MB driver *OK107-Gal4* (Figure 3A). Similar to observations in human cerebral cortex  
457 tissues (Huynh *et al.* 2003), *Atx2* is nearly excluded from nuclei and localizes strongly to the soma  
458 cytoplasm of MB Kenyon cells in adults *in vivo*. In contrast, *Nab2* localizes predominantly to the nuclei  
459 of these neurons *in vivo*. This distinction extends beyond the soma and into the  $\alpha$  and  $\beta$  lobe axon tracts;

460 Atx2 localizes robustly to these cytoplasmic compartments while Nab2 does not (Supplemental Figure  
461 2).

462 To more rigorously assess Nab2-Atx2 protein interactions across all cell compartments, we  
463 expressed a FLAG-tagged Nab2 transgene (*UAS-Nab2-FLAG*) (Pak *et al.* 2011) using the pan-neuronal  
464 driver *elav-Gal4* (Lin and Goodman 1994) and subjected brain-neuron-enriched head lysates to  
465 immunoprecipitation with  $\alpha$ -FLAG-conjugated beads to recover Nab2-associated proteins. Probing with  
466 specific antibodies confirms that Fmr1 is enriched in Nab2 immunoprecipitates as previously reported  
467 (Bienkowski *et al.* 2017), but reveals weak enrichment of Atx2 (Figure 3B). These results indicate  
468 complexes containing Nab2 and Atx2 may form in neurons but are rare relative to Nab2-Fmr1  
469 complexes. Taken together, these subcellular localization and biochemical data suggest Nab2 and Atx2  
470 do not generally co-occupy the same RNA or mRNP complexes throughout the post-transcriptional life  
471 of an RNA in adult mushroom body neurons. Therefore, we considered the possibility that *Nab2-Atx2*  
472 genetic interactions instead reflect roles in post-transcriptional control of shared RNA targets at different  
473 points in time or different locations in the cell.

#### 474 **The Nab2 and Atx2 RNA interactomes in brain neurons overlap**

475 Neither Nab2- nor Atx2-associated RNAs have been identified by a high-throughput method in  
476 *Drosophila*—such accounting has been conducted for Atx2 in human cells (Yokoshi *et al.* 2014) and for  
477 Nab2 only in *S. cerevisiae*, not in any metazoan (Guisbert *et al.* 2005; Batisse *et al.* 2009; Tuck and  
478 Tollervey 2013; Baejen *et al.* 2014). To test the hypothesis that Nab2 and Atx2 share RNA targets, we  
479 identified transcripts stably associated with epitope-tagged versions of each protein in adult brain  
480 neurons using an RNA immunoprecipitation-sequencing (RIP-Seq) approach. In this approach, protein  
481 products of *UAS-Nab2-FLAG* or *UAS-Atx2-3xFLAG* transgenes are robustly expressed under *elav-Gal4*  
482 control and are efficiently immunoprecipitated from adult head lysates (Figure 4A). Briefly, four

483 biological replicates each of *elav-Gal4*, *elav>Nab2-FLAG*, and *elav>Atx2-3xFLAG* adult female  
484 *Drosophila* heads were lysed and immunoprecipitated with  $\alpha$ -FLAG-conjugated beads. Then, RNA from  
485 both IP and Input samples was rRNA depleted, reverse transcribed into stranded cDNA libraries, and  
486 sequenced. Using the Galaxy web platform through the public server at usegalaxy.org (Afgan *et al.*  
487 2018), reads were mapped using STAR (Dobin *et al.* 2013) to the BDGP6.22 release of the *Drosophila*  
488 *melanogaster* genome (sourced through Ensembl, Yates *et al.* 2020), assigned to exons/genes and tallied  
489 using *featureCounts* (Liao *et al.* 2014), and normalized for inter-library count comparisons using  
490 *DESeq2* (Love *et al.* 2014). A principal component analysis (PCA) generated as part of *DESeq2*  
491 demonstrates the high inter-genotype reproducibility among RNA IP (RIP) samples and shows that  
492 samples expressing Nab2-FLAG or Atx2-3xFLAG differ more from *elav-Gal4* controls than from one  
493 another (Figure 4B).

494 To identify Nab2-associated and Atx2-associated RNAs, we calculated percent input (IP/Input)  
495 enrichment values (Zhao *et al.* 2010; Aguilo *et al.* 2015; Li *et al.* 2019) for each of the 5,760 genes in  
496 the testable set defined by 1) detectable expression in all twelve Inputs and 2) an average normalized  
497 Nab2- or Atx2-IP read count greater than 10 (Lu *et al.* 2014; Malmevik *et al.* 2015). Fold enrichment  
498 differences were statistically tested by performing gene-by-gene one-way ANOVAs (Li *et al.* 2019),  
499 applying Dunnett's post-hoc test (Dunnett 1955), and calculating adjusted *p*-values corrected for  
500 multiple hypothesis testing within each gene-by-gene ANOVA (values hereafter referred to as *Dun. Adj.*  
501 *p*; see *Materials and Methods* for more detail). Using this approach, we identify 141 and 103 RNAs  
502 significantly enriched in  $\alpha$ -FLAG IPs of *elav>Nab2-FLAG* and *elav>Atx2-3xFLAG* female heads,  
503 respectively (Supplemental Table 2, Supplemental Figure 3). The size and focus of these sets of  
504 statistically significantly enriched RNAs suggests type I (i.e. false positive) error is sufficiently  
505 controlled and additional corrections between genes are not necessary (Rothman 1990). Comparing the

506 Nab2- and Atx2-IP groups strongly supports our hypothesis, revealing 28 transcripts shared between  
507 Nab2- and Atx2-associated *Drosophila* neuronal RNAs (Figure 4C). This overlap is highly significant  
508 according to the hypergeometric test—it is extremely unlikely to occur by random selection from the  
509 total tested gene set. The full list of transcripts associated with both Nab2 and Atx2 (Table 1) includes  
510 multiple mRNAs that encode proteins with functions in neuronal domains in which *Nab2* and *Atx2*  
511 genetically interact, raising the possibility that coregulation of these RNAs by Nab2 and Atx2 partially  
512 explains these *Nab2-Atx2* genetic links. These shared transcripts include *drk* (*downstream of receptor*  
513 *kinase*), *me31B* (*maternal expression at 31B*), *sm* (*smooth*), and *stai* (*stathmin*). The protein encoded by  
514 *drk* is a receptor tyrosine kinase (RTK) adaptor that regulates growth and development by binding  
515 activated RTKs, such as sevenless in R7 retinal cells (Almudi *et al.* 2010), and contributes to, among  
516 other processes, cell survival in the eye (Schoenherr *et al.* 2012) and olfactory learning and memory in  
517 the MB (Moressis *et al.* 2009). The protein encoded by *me31B* is a DEAD-box RNA helicase expressed  
518 in many cellular contexts, including the MB Kenyon cells (Hillebrand *et al.* 2010) and the oocyte  
519 (Nakamura *et al.* 2001), that physically associates with Atx2 (Lee *et al.* 2017) and serves as a central  
520 player in miRNA-mediated translational repression (Barbee *et al.* 2006) and assembly of some RNP  
521 granules (Eulalio *et al.* 2007). Finally, the proteins encoded by *sm* and *stai* are respectively an hnRNP  
522 linked to defects in axon termination (Layalle *et al.* 2005) and a tubulin binding protein linked to natural  
523 variation in the size of MB  $\alpha$  and  $\beta$  lobes (Lachkar *et al.* 2010; Zwarts *et al.* 2015).

524 The 28 shared transcripts represent approximately 20% and 24% of the total transcripts identified  
525 as Nab2- and Atx2-associated, respectively, underscoring that these proteins also associate with RNA  
526 sets independent from one another. From these independent sets, we defined the top Nab2-specific and  
527 Atx2-specific associated transcripts as the top 20 most significantly associated transcripts (by *Dun. Adj.*  
528 *p*) and top 20 most strongly enriched transcripts (by IP/Input) in each set. As with shared RNAs,



529 multiple RBP-specific RNAs with links to *Nab2* or *Atx2* functions or mutant phenotypes are identified  
530 among these top transcripts, raising the possibility that regulation of these RNAs by *Nab2* or *Atx2*  
531 partially explains the mechanism of action of these RBPs (Figure 4D,E). For example, the top *Nab2*-  
532 specific associated RNAs include *Arpc2* (*Actin-related protein 2/3 complex, subunit 2*), *side-II* (*sidestep*  
533 *II*), and *Cpsf160* (*Cleavage and polyadenylation specificity factor 160*). These transcripts respectively  
534 encode proteins with proposed functions in neuronal growth cone advance (Yang *et al.* 2012), synapse  
535 formation between certain neuronal subtypes (Tan *et al.* 2015), and mRNA poly(A)-tail formation based  
536 on orthology to mammalian *Cpsf1* (Mandel *et al.* 2008). The top *Atx2*-specific associated RNAs include  
537 *dj-1 $\beta$* , *mtm* (*myotubularin*), and *Snx16* (*Sorting nexin 16*). These transcripts respectively encode proteins  
538 with proposed functions in ATP synthesis and motor neuron synaptic transmission (Hao *et al.* 2010;  
539 Oswald *et al.* 2018), endosomal trafficking regulation via phosphatase activity (Velichkova *et al.* 2010;  
540 Jean *et al.* 2012), and neuromuscular junction synaptic growth (Rodal *et al.* 2011).

541 **Gene Ontology terms enriched in *Nab2* and *Atx2* RNA interactomes emphasize additional RBP-**  
542 **associated transcripts**

543 Evaluating *Nab2*- and *Atx2*-associated RNAs individually provides valuable but incomplete insight,  
544 allowing larger trends to be missed. To complement these analyses, we holistically evaluated the shared  
545 and specific *Nab2*- and *Atx2*-associated transcripts by subjecting each gene list to PANTHER Gene  
546 Ontology (GO) analysis, revealing the identities and members of enriched GO terms in each transcript  
547 set (Ashburner *et al.* 2000; Mi *et al.* 2019; The Gene Ontology Consortium 2019). Critically, GO term  
548 enrichment was calculated by comparing term abundance between these lists and the testable set of  
549 5,760 head-enriched genes rather than the entire genome. In this way, these analyses did not identify GO  
550 terms as enriched simply because of their overrepresentation in *Drosophila* heads. Among shared *Nab2*-  
551 and *Atx2*-associated RNAs, we identify overrepresented GO terms and RBP-associated transcripts

552 within them that highlight crucial functions and processes Nab2 and Atx2 may coregulate (Figure 4F).  
553 Among these GO terms are ‘microtubule binding’, which includes *apolpp* (*apolipoporphin*) and *shi*  
554 (*shibire*); ‘sensory perception of taste’, which includes *Gao* and *Gγ30A*; ‘gene silencing by miRNA’,  
555 which includes *AGO2* (*Argonaute 2*) and *me31B*; and ‘short-term memory’, which includes *shi* and *drk*.  
556 Survey of the associated RNAs specific to either RBP reveals overrepresented GO terms and transcripts  
557 within them which may mediate processes Nab2 and Atx2 regulate independently of one another,  
558 including respectively the GO terms ‘exosomal secretion’, which includes *Rab35* and *Rab7*; and  
559 ‘regulation of ATP metabolic process’, which includes *Dg* (*Dystroglycan*) and *dj-1β* (Supplemental  
560 Figure 4).

561 To combine and summarize the individual transcript and GO analyses, we highlight groups of  
562 seven transcripts found within the shared (Figure 5A) and RBP-specific (Figure 5B,C) associated  
563 transcript sets. These highlights were selected from the combined set of transcripts 1) demonstrating a  
564 fold enrichment (IP/Input) greater than 1.5 and/or 2) included in the most overrepresented GO terms  
565 (fully defined in Supplemental Table 3). Beyond transcripts already described, this summary includes  
566 the shared transcript *HmgZ* (*HMG protein Z*), Nab2-specific transcripts *fwe* (*flower*) and *SLC22A*  
567 (*SLC22A family member*), and Atx2-specific transcripts *tea* (*telomere ends associated*) and *Xpc*  
568 (*Xeroderma pigmentosum, complementation group C*). A group of functionally diverse transcripts in the  
569 testable set that did not associate with either RBP is shown for comparison and as evidence of the  
570 specificity of the RIP-Seq assay (Figure 5D).

### 571 **Polyadenosine sequence motifs are enriched in Nab2-associated RNAs**

572 The diversity of RNAs that do not associate with Nab2 and Atx2 in the RIP assay (Figure 5D)  
573 underscores a key finding—both of these RBPs exhibit specific RNA-association patterns within brain  
574 neurons. This observation is not surprising for Atx2 given, for example, the sequence specificity of its

575 human homolog in HEK293T cells (Yokoshi *et al.* 2014), but it represents a valuable insight for Nab2.  
576 The extent of the metazoan Nab2/ZC3H14 RNA target pool has been an enduring question (Rha *et al.*  
577 2017a), given the breadth of the *S. cerevisiae* Nab2 target pool (Batisse *et al.* 2009; Tuck and Tollervey  
578 2013) and the ability of Nab2/ZC3H14 across eukaryotes to bind polyadenosine RNA *in vitro* (Kelly *et*  
579 *al.* 2007; Pak *et al.* 2011), raising the possibility for very broad binding of mRNAs via their poly(A)  
580 tails *in vivo*. We found a relatively focused set of RNAs co-precipitate with Nab2-FLAG from fly brain  
581 neurons, indicating Nab2 may indeed exhibit greater specificity in *Drosophila* than would be observed if  
582 the protein bound all or most polyadenylated transcripts via their poly(A) tails.

583 Thus, we sought to determine what additional RNA sequence features may drive the association  
584 of Nab2 with its target transcripts if not only the presence of a poly(A) tail. We used MEME (Bailey and  
585 Elkan 1994) to scan all Nab2-associated transcripts to identify shared sequence motifs that may  
586 represent Nab2 binding sites and partially explain Nab2 specificity. Strikingly, this analysis identifies a  
587 41-bp long, internal-A-rich stretch among the first ten 6-50-bp motifs shared among Nab2-associated  
588 transcripts. Importantly, each of these 10 sequence motifs are shared across overlapping sets of many  
589 but not all Nab2-associated RNAs. Using FIMO (Grant *et al.* 2011), another part of the MEME Suite  
590 (Bailey *et al.* 2009), we quantified the frequency of close and exact matches to the consensus version of  
591 this motif among Nab2-associated RNAs. Occurrences of this A-rich motif are significantly more  
592 common in Nab2-associated transcripts compared to non-Nab2 associated transcripts, respectively  
593 appearing once every 135 bases and once every 845 bases on average, a 6.3-fold enrichment (Figure  
594 6A). The high frequency of this motif in Nab2-associated transcripts is consistent with data from *S.*  
595 *cerevisiae* that Nab2 does not associate with RNAs exclusively through the poly(A) tail and also binds  
596 to upstream UTRs and coding sequences, likely through other A-rich sequences (Guisbert *et al.* 2005;  
597 González-Aguilera *et al.* 2011; Tuck and Tollervey 2013; Baejen *et al.* 2014; Aibara *et al.* 2017).

598 Importantly, that this A-rich motif is enriched in but not exclusive to Nab2-associated RNAs is  
599 consistent with results for other RBPs—linear sequence motifs alone are generally insufficient to  
600 explain RBP specificity (Dominguez *et al.* 2018) and RBPs do not generally occupy all of their available  
601 binding motifs throughout the transcriptome (Li *et al.* 2010; Taliaferro *et al.* 2016).

602 As a complement to these analyses, we used FIMO to scan Nab2-associated RNAs for the  
603 presence of the smallest canonical binding motifs sufficient for Nab2 association in *S. cerevisiae*—A<sub>12</sub>  
604 and A<sub>11</sub>G (Guisbert *et al.* 2005; Aibara *et al.* 2017). This approach reveals that in *Drosophila* brain  
605 neurons A<sub>12</sub> and A<sub>11</sub>G sites are significantly but moderately more common in Nab2-associated  
606 transcripts compared to non-Nab2 associated transcripts. These A<sub>12</sub> and A<sub>11</sub>G sites appear respectively  
607 once every 1,553 and 687 bases on average among Nab2-associated transcripts and once every 1,901  
608 and 935 bases on average among non-Nab2-associated transcripts, a 1.2- and 1.4-fold enrichment  
609 (Figure 6B,C). Taken together, the findings that Nab2 associates with a specific subset of all RNAs with  
610 poly(A) tails, and that these three A-rich motifs are not exclusive to Nab2-associated RNAs, strongly  
611 argues that the polyadenosine sequence affinity of Nab2 alone is insufficient to explain Nab2-RNA  
612 association specificity in *Drosophila* brain neurons. Other mechanisms must also contribute to Nab2  
613 target choice, such as RNA secondary structure, protein-protein interactions, subnuclear localization,  
614 and binding site competition. That said, the significant enrichment of a 41-bp A-rich motif, A<sub>12</sub>, and  
615 A<sub>11</sub>G observed in Nab2-associated RNAs suggests Nab2-RNA association is partially mediated through  
616 these genetically encoded RNA sequence motifs as well as or instead of through the poly(A) tail.

617

## 618 **Discussion**

619 Mutation of either *ZC3H14* or *ATXN2* gives rise to human disease, and the Nab2 and Atx2 RNA-  
620 binding proteins encoded by their *Drosophila* orthologs are linked by a shared association with Fmr1

621 (Sudhakaran *et al.* 2014; Bienkowski *et al.* 2017). Here we show that *Nab2* and *Atx2* interact in multiple  
622 contexts in *Drosophila*, specifically in fated eye cells, adult viability, and mushroom body neuronal  
623 morphology. Notably, these interactions are dose-sensitive, as heterozygosity for *Atx2* loss-of-function  
624 alleles is sufficient to suppress *Nab2* null phenotypes in adult viability and MB morphology. That is,  
625 loss of *Nab2* may sensitize these domains to reduced *Atx2* activity, suggesting these RBPs regulate  
626 some common processes. We find that these *Nab2-Atx2* interactions are likely not explained by  
627 extended, simultaneous co-occupancy of *Nab2* and *Atx2* in common RNP complexes on shared RNA  
628 transcripts. Each protein is concentrated in distinct subcellular compartments in adult mushroom body  
629 neurons *in vivo*, and *Nab2* and *Atx2* weakly associate by co-IP from brain neurons. Thus, to explore an  
630 alternative possibility—sequential regulation of shared RNA transcripts—we have carried out the first  
631 high-throughput identification of *Nab2*- and *Atx2*-associated RNAs in *Drosophila*. We find these  
632 proteins associate with overlapping sets of transcripts in *Drosophila* neurons, consistent with their  
633 shared and distinct functions and supporting the model of sequential regulation. Identification of these  
634 protein-transcript associations promises further insight into the functions shared between and unique to  
635 each RBP. In addition, the identification of *Drosophila* *Nab2*-associated RNAs begins to address  
636 longstanding questions about *Nab2* function and the particular sensitivity of neurons to *Nab2* loss,  
637 revealing that *Nab2* associates with a specific subset of polyadenylated RNAs *in vivo* despite the  
638 theoretical potential to bind across all polyadenylated transcripts suggested by its high polyadenosine  
639 affinity *in vitro* (Pak *et al.* 2011).

#### 640 **A model of opposing regulatory roles for *Nab2* and *Atx2***

641 We show that *Nab2* and *Atx2* share associated RNAs in *Drosophila* neurons (Figures 4,5) and  
642 that *Atx2* loss-of-function alleles suppress phenotypes of *Nab2* loss (Figures 1,2). Taken together, these  
643 findings imply that, at least for transcripts crucial for adult survival and MB  $\alpha$  lobe morphology, *Nab2*

644 and Atx2 exert opposing regulatory roles on their shared associated RNAs. This opposing role  
645 possibility aligns with some of the known functions of each protein. Namely, in *S. cerevisiae* Nab2  
646 contributes to proper nuclear processing events including protection from enzymatic degradation,  
647 poly(A) tail length control, splicing, and transcriptional termination while also facilitating poly(A) RNA  
648 export from the nucleus (Green *et al.* 2002; Hector *et al.* 2002; Kelly *et al.* 2010; Schmid *et al.* 2015;  
649 Soucek *et al.* 2016; Alpert *et al.* 2020). If *Drosophila* Nab2 also performs some or all of these nuclear  
650 processing roles on its associated RNAs, then Nab2 binding should contribute to transcript stability,  
651 nuclear export, and ultimately protein expression. Atx2, in contrast, is a key regulator of translational  
652 efficiency in the cytoplasm, suppressing the translation of some target RNAs and activating the  
653 translation of others (reviewed in Lee *et al.* 2018). As our data suggest Nab2 and Atx2 act in functional  
654 opposition on a shared transcript set, we propose Atx2 primarily functions as a translational inhibitor  
655 rather than activator on shared Nab2- and Atx2-associated RNAs. In this model (Figure 7), Nab2 and  
656 Atx2 would act in temporal and spatial sequence to balance protein expression from their shared  
657 associated RNAs in neurons, with Nab2 promoting proper nuclear RNA processing, stability, and export  
658 and Atx2 inhibiting RNA translation, respectively.

659 This model of sequential temporal and spatial regulation aligns with evidence that Nab2 and  
660 Atx2 primarily localize to different subcellular compartments in adult MBs at steady state and exhibit a  
661 low level of co-precipitation from brain neurons (Figure 3). Potential explanations for the combination  
662 of distinct localization profiles and limited physical association between Nab2 and Atx2 are found in  
663 proposals that *S. cerevisiae* Nab2 shuttles out of the nucleus with bound RNAs during export before  
664 releasing them and returning to the nucleus (Aitchison *et al.* 1996; Lee and Aitchison 1999; Duncan *et al.*  
665 *et al.* 2000). Thus, Nab2 and Atx2 may physically share associated RNAs briefly if neuronal *Drosophila*  
666 Nab2 similarly shuttles and both RBPs are present during the nuclear-cytoplasmic handoff of mRNP

667 remodeling that follows mRNA export from the nucleus (reviewed in Müller-McNicoll and Neugebauer  
668 2013; Chen and Shyu 2014). Functional and physical links between Nab2 and an RBP with a prominent  
669 cytoplasmic localization pattern like Atx2 have been observed previously, specifically with Fmr1  
670 (Bienkowski *et al.* 2017). However, the physical associations observed between Fmr1 and Nab2 are  
671 more robust than that observed between Atx2 and Nab2 in the present study (Figure 3B)—this  
672 distinction may be partially explained by the different localization patterns of Atx2 and Fmr1. Atx2 is  
673 exclusively cytoplasmic in neurons except under certain pathogenic conditions (Huynh *et al.* 2003;  
674 Lessing and Bonini 2008; Elden *et al.* 2010), while Fmr1 shuttles between the two compartments,  
675 associating with at least some of its target RNAs in the nucleus (Tamanini *et al.* 1999; Kim *et al.* 2009).  
676 Thus, Nab2 and Fmr1 may theoretically co-occupy and coregulate shared transcripts in both cellular  
677 compartments while Nab2 and Atx2 sequentially regulate shared transcripts exchanged during a nuclear-  
678 cytoplasmic handoff, representing two distinct modes of functional interaction between Nab2 and a  
679 cytoplasmic RBP.

680 This model provides a firm foundation and raises many readily testable hypotheses to be  
681 explored in future research. The model predicts that for shared Nab2- and Atx2-associated RNAs, loss  
682 of Nab2 decreases transcript stability, impedes proper nuclear processing events including poly(A) tail  
683 length control, and impairs poly(A) RNA export from the nucleus, ultimately leading to decreases in  
684 protein product. Conversely, we predict partial loss of Atx2 releases translational inhibition on these  
685 shared transcripts and induces increases in protein product. Finally, loss of both proteins would balance  
686 these effects, resulting in steady-state levels of protein product more similar to the wild-type condition.  
687 With the identity of Nab2- and Atx2-associated RNAs in hand, future research is enabled to test these  
688 predictions.

689 **Prominent Nab2- and Atx2-associated transcripts provide links to brain development and**  
690 **function**

691 Of all the RBP-associated transcripts identified here, we defined the prominent shared and RBP-specific  
692 associated transcripts as those annotated within overrepresented GO terms (Figure 4F, Supplemental  
693 Figure 4) and/or passing a 1.5-fold enrichment threshold. The identities and functional roles of these  
694 prominent RBP-associated transcripts (examples in Figure 5) provide potential mechanistic explanations  
695 for the biological roles of each RBP. For example, the effects of Nab2 and Atx2 on MB morphology  
696 may be mediated in part through regulation of shared mRNAs *sm* and *stai*, which respectively encode an  
697 hnRNP and a tubulin binding protein both linked to axonal morphology and development (Layalle *et al.*  
698 2005; Lachkar *et al.* 2010; Zwarts *et al.* 2015). The effects of Nab2 and Atx2 on memory (Sudhakaran *et*  
699 *al.* 2014; Kelly *et al.* 2016) may be due in part to regulation of shared transcripts *drk*, *shi*, *Gao*, and  
700 *me31B*, all of which encode proteins with roles in memory formation or retrieval (Dubnau *et al.* 2001;  
701 Ferris *et al.* 2006; Moressis *et al.* 2009; Sudhakaran *et al.* 2014). Both Nab2 and Atx2 may be involved  
702 in RNAi at multiple levels, regulating *me31B* RNA in neurons in addition to associating, in the case of  
703 Atx2, with *me31B* protein (Lee *et al.* 2017; Bakthavachalu *et al.* 2018). Finally, the suppression of  
704 *GMR>Nab2* by *Atx2* alleles in the eye may be explained in part by the shared association of Nab2 and  
705 Atx2 with *HmgZ* (*HMG protein Z*) RNA, which encodes a chromatin remodeler linked to survival of R7  
706 retinal photoreceptor neurons (Kanuka *et al.* 2005; Ragab *et al.* 2006).

707 Among the associated RNAs specific to each RBP, we found only Nab2 associated with *fwe*  
708 (*flower*), *Arcp2*, *side-II*, and *SLC22A* RNA, connections which may further explain the role of Nab2 in  
709 guiding MB morphology and regulating learning and memory. These transcripts respectively encode a  
710 transmembrane mediator of neuronal culling in development (Merino *et al.* 2013), a component of the  
711 neuronal growth cone advance-regulating Arp2/3 complex (Hudson and Cooley 2002; Yang *et al.* 2012),



712 an immunoglobulin superfamily member potentially contributing to axon guidance and synapse  
713 formation in the optic lobe (Tan *et al.* 2015), and a transmembrane acetylcholine transporter localized to  
714 MB dendrites and involved in suppressing memory formation (Gai *et al.* 2016). On the other hand, the  
715 association of Atx2 with Atx2-specific RNAs *Xpc* and *tea*, which respectively encode players in the  
716 fundamental cellular processes of DNA repair and telomere protection (Henning *et al.* 1994; Goosen  
717 2010; Zhang *et al.* 2016), may partially explain why Atx2 genomic loss, unlike Nab2 genomic loss, is  
718 larval lethal (Satterfield *et al.* 2002). In summary, defining the potential functional impact of Nab2- and  
719 Atx2-RNA associations like these will provide critical insight into the roles of Nab2 and Atx2 in  
720 neurodevelopment and *Drosophila* disease models.

### 721 **Nab2 associates with a more specific set of RNAs in metazoans than in *S. cerevisiae***

722 The degree of RNA association specificity metazoan Nab2/ZC3H14 exhibits has been a longstanding  
723 question, in part because competing answers are suggested by the functional similarities and differences  
724 between metazoan Nab2/ZC3H14 and the *S. cerevisiae* Nab2 ortholog. In *S. cerevisiae*, Nab2 is  
725 essential for viability (Anderson *et al.* 1993) and is a central player in post-transcriptional regulation of  
726 many transcripts, serving as a nuclear poly(A)-binding-protein regulating transcript stability (Schmid *et al.*  
727 2015), poly(A) tail length, and poly(A) RNA export from the nucleus among other processes  
728 (reviewed in Moore 2005; Chen and Shyu 2014; and Stewart 2019). However, in metazoans Nab2 or the  
729 full-length form of ZC3H14 is dispensable for cellular viability, and the effects of either protein on  
730 poly(A) tail length and poly(A) RNA export from the nucleus are either less pronounced and likely  
731 exerted on fewer transcripts than in *S. cerevisiae* or are not detected (Farny *et al.* 2008; Kelly *et al.*  
732 2010; Wigington *et al.* 2016; Bienkowski *et al.* 2017; Rha *et al.* 2017b; Morris and Corbett 2018).  
733 Consistently, Nab2/ZC3H14 have not been found to associate with all polyadenylated RNAs tested in  
734 metazoans so far (Wigington *et al.* 2016; Bienkowski *et al.* 2017; Morris and Corbett 2018), but the

735 possibility has remained that these few identified non-Nab2/ZC3H14-associated transcripts are outliers  
736 and metazoan Nab2/ZC3H14 associates with a large majority of polyadenylated RNAs similarly to *S.*  
737 *cerevisiae* Nab2 (Tuck and Tollervy 2013), likely in part by binding poly(A) tails. Indeed, the identities  
738 of Nab2- or ZC3H14-associated RNAs in metazoans had never previously been addressed with a  
739 comprehensive, high-throughput method.

740 Our results identify a specific set of transcripts that neuronal Nab2 associates with in *Drosophila*.  
741 Of the 5,760 transcripts tested in the RIP-Seq, only about 2.5% were found to associate with Nab2 in  
742 *Drosophila* neurons (Figure 4), a much smaller percentage of the transcriptome than associates with  
743 Nab2 in *S. cerevisiae* (Guisbert *et al.* 2005; Batisse *et al.* 2009; Tuck and Tollervy 2013). Importantly,  
744 this likely represents an undercount of all Nab2-associated transcripts in neurons *in vivo*—some RNAs  
745 associated with Nab2 in prior studies are absent from our Nab2-associated transcript set (Bienkowski *et*  
746 *al.* 2017; Jalloh *et al.* 2020), and technical limitations impacted our sequencing read depth (see  
747 *Methods*). Higher sensitivity approaches (e.g. CLIP-Seq) could reveal a broader set of Nab2-associated  
748 transcripts in *Drosophila* than we define here. Nonetheless, in the present study the majority of both  
749 RNAs (Figure 4) and tested polyadenosine-rich sequence motifs (Figure 6) were not found to be  
750 associated with Nab2, strongly supporting a model in which Nab2 associates with a specific subset of  
751 RNAs in *Drosophila* neurons. Perhaps for this more select group of transcripts Nab2 still plays a key  
752 role in transcript stability, poly(A) tail length control, transcription termination, and poly(A) RNA  
753 export from the nucleus, such that defects will only be observed in targeted examinations of single  
754 transcripts and not in bulk assays—one does not always reflect the other (Kelly *et al.* 2014; Bienkowski  
755 *et al.* 2017). This model of Nab2 specificity in *Drosophila* aligns well with the knowledge that  
756 Nab2/full-length ZC3H14 is essential for cellular viability in *S. cerevisiae* (Anderson *et al.* 1993) but not  
757 in *Drosophila* (Bienkowski *et al.* 2017), mice (Rha *et al.* 2017b), or, seemingly, humans (Pak *et al.*

758 2011; Al-Nabhani *et al.* 2018). This diminished global requirement for Nab2/ZC3H14 in metazoans may  
759 be due, at least in part, to functional overlap with PABPN1, an evolutionarily distinct nuclear  
760 polyadenosine RNA-binding protein that is absent in *S. cerevisiae* (Mangus *et al.* 2003) but controls  
761 poly(A) tail length and is essential in *Drosophila* (Benoit *et al.* 2005), mice (Vest *et al.* 2017), and  
762 humans (Hart *et al.* 2015).

763 The model of Nab2 specificity in *Drosophila* does not conflict with its affinity for  
764 polyadenosine, which could theoretically allow Nab2 to bind all transcripts with a poly(A) tail. Even in  
765 *S. cerevisiae*, the broad binding profile of Nab2 (Batisse *et al.* 2009) and central role in poly(A) tail  
766 length control (Kelly *et al.* 2010), poly(A) RNA export from the nucleus (Green *et al.* 2002), and  
767 protection of poly(A) RNA from degradation (Schmid *et al.* 2015) does not translate to binding the  
768 poly(A) tails of all transcripts (Guisbert *et al.* 2005; Tuck and Tollervey 2013). More broadly, linear  
769 sequence motifs alone are insufficient to explain RBP specificity—RBPs do not generally occupy all of  
770 their available binding motifs throughout the transcriptome (Li *et al.* 2010; Taliaferro *et al.* 2016).  
771 Moreover, non-paralog RBPs with substantially overlapping or identical linear target motifs still bind  
772 distinct RNA target sets, demonstrating that linear motifs are only one of a set of RNA features that  
773 direct RBP-RNA associations (Dominguez *et al.* 2018). Based on the present study, these general  
774 features of RBPs hold for Nab2 as well. MEME and FIMO motif analyses reveal a long A-rich motif  
775 and the canonical Nab2 binding motifs A<sub>12</sub> and A<sub>11</sub>G are enriched in but not exclusive to Nab2-  
776 associated RNAs (Figure 6). Given the behavior of other RBPs, it is consistent that *Drosophila* Nab2  
777 exhibits this binding specificity and, given our RIP-Seq data and previous studies, likely binds some but  
778 almost certainly does not bind not all poly(A) tails in *Drosophila* despite its high affinity for  
779 polyadenosine RNA *in vitro* (Pak *et al.* 2011).

780 Taken together, these data align with the model that in metazoans Nab2/ZC3H14 is more  
781 specific in its transcript associations than in *S. cerevisiae*. With this model in mind and the Nab2-  
782 associated transcripts identified in this study in hand, future research will be enabled to focus on how  
783 Nab2 functions on these particular transcripts in *Drosophila*, and why this function is so crucial for adult  
784 viability, neuronal morphology, locomotion, and learning and memory. Given that a polyadenosine-rich  
785 motif along with A<sub>12</sub> and A<sub>11</sub>G motifs are correlated with but are not sufficient for Nab2-RNA  
786 association, future research must also focus on what additional features of transcripts or their associated  
787 proteins promote or prevent Nab2 association.

## 788 **Conclusion**

789 In sum, the data we present here identify functional interactions between Nab2 and Atx2 in *Drosophila*  
790 brain morphology and adult viability and define a set of RNA transcripts associated with each protein in  
791 brain neurons. Crucially, these RNA sets overlap—some associated transcripts are shared between  
792 Nab2 and Atx2 and some are specific to each RBP. Identifying these RBP-associated transcripts  
793 provides potential mechanistic links between the roles in neuronal development and function their  
794 encoded proteins perform, Nab2, and Atx2. This foundation will be especially important for Nab2, as  
795 the exact molecular function of metazoan Nab2/ZC3H14 on the vast majority of its associated RNAs in  
796 any cell type remains largely unknown. The identity of many *Drosophila* Nab2-associated transcripts,  
797 now revealed, will be required to define Nab2/ZC3H14 function in metazoans and enable our  
798 understanding of why loss of this largely nuclear polyadenosine RNA-binding protein results in  
799 neurological or neurodevelopmental deficits in flies and mice and in intellectual disability in humans.

800

## Acknowledgements

The authors would like to thank current and past members of the Moberg and Corbett lab groups, especially Drs. Ayan Banerjee, Rick Bienkowski, Daniel Barron, Binta Jalloh, Stephanie Jones, Annie McPherson-Davie, Milo Fasken, and Sara Leung for their support of, instruction in, and enlightening discussions of this work. We would also like to thank Drs. Bing Yao, Jingjing Yang, Michael Christopher, and Carlos Moreno for initial bioinformatics advice and the Georgia Genomics and Bioinformatics Core (GGBC) at the University of Georgia, especially Tyler James Simmonds and Dr. Magdy S. Alabady, for essential library preparation, sequencing, and assistance in sequencing experiment design and preparation.

We would like to thank Drs. Nancy Bonini and Michael Parisi for the gift of a *Atx2<sup>XI</sup>* stock; Dr. Ravi Allada, Khadijah Hamid, and Dr. Satya Surabhi for the gift of a *UAS>Atx2-3xFLAG* stock; Dr. Chunghun Lim and for the gift of rabbit  $\alpha$ -Atx2; Dr. Corey S. Goodman for the contribution of 1D4 Anti-Fas2 to the DSHB; Drs. Gary Bassell, Roger Deal, Steven Warren, James Q. Zheng, and their respective labs for assistance and use of their equipment; Laura Fox-Goharioon for confocal microscope training; Dr. Michael I. Love for extensive public online instruction in the methodology and use of *DESeq2*; Dr. Mauricio Rodriguez-Lanetty for a public TRIzol-column hybrid RNA extraction protocol; and Eileen Chow for public video instruction in bulk *Drosophila* head isolation.

The authors would also like to thank with particular enthusiasm the authors, contributors, and ongoing maintainers of the incredible public resources supporting this work and without which it would not have been possible, including Flybase (NIH U41HG000739, UK MRC MR/N030117/1), the Galaxy Project (NIH 2U41HG006620), the R Project, the Developmental Studies Hybridoma Bank (University of Iowa, NIH), and the Bloomington *Drosophila* Stock Center (NIH P40OD018537). This research was funded by grants from the National Institutes of Health, specifically from the National Institute of Child Health and Human Development (F31 HD088043) to J.C.R. and from the National Institute of Mental Health (R01 MH107305) to A.H.C. and K.H.M. The authors declare no conflicts of interest.

| Shared Nab2- and Atx2-associated transcripts |                             |               |                          |
|----------------------------------------------|-----------------------------|---------------|--------------------------|
| <i>AGO2</i>                                  | <i>drk</i>                  | <i>me31B</i>  | <i>shi</i>               |
| <i>apolpp</i>                                | <i>Gao</i>                  | <i>Msp300</i> | <i>sm</i>                |
| <i>CG31221</i>                               | <i>Gat</i>                  | <i>mtd</i>    | <i>snoRNA:Or-aca5</i>    |
| <i>CG42540</i>                               | <i>Gγ30A</i>                | <i>Rbp6</i>   | <i>snoRNA:Or-CD2</i>     |
| <i>CG4360</i>                                | <i>Gp150</i>                | <i>RpL37A</i> | <i>snoRNA:Ψ18S-1854b</i> |
| <i>CG6675</i>                                | <i>HmgZ</i>                 | <i>RpS27A</i> | <i>Stai</i>              |
| <i>CG9813</i>                                | <i>I(3)80Fg<sup>a</sup></i> | <i>RpS29</i>  | <i>Ulp1</i>              |

**TABLE 1. Identities of the 28 transcripts overlapping between the Nab2 and Atx2 RNA interactomes.** For all 5,760 genes in the RIP-Seq testable set, control-normalized IP/Input enrichment values were calculated followed by gene-by-gene one-way ANOVAs, Dunnett's post-hoc tests, and within-gene multiple hypothesis testing adjustment (*Dun. Adj. p*). All transcripts statistically significantly (*Dun. Adj. p* < 0.05) enriched in both Nab2- and Atx2-associated transcripts sets are listed here. Functional interactions between Nab2 and Atx2 in brain neurons may be explained by their coordinate regulation of these shared associated transcripts.

<sup>a</sup>Symbol updated from *CG40178* to current nomenclature in BDGP6.37.

## Literature Cited

- Afgan E., D. Baker, B. Batut, M. van den Beek, D. Bouvier, *et al.*, 2018 The Galaxy platform for accessible, reproducible and collaborative biomedical analyses: 2018 update. *Nucleic Acids Res.* 46: 537–544. <https://doi.org/10.1093/nar/gky379>
- Agha Z., Z. Iqbal, M. Azam, H. Ayub, L. E. L. M. Vissers, *et al.*, 2014 Exome Sequencing Identifies Three Novel Candidate Genes Implicated in Intellectual Disability, (O. R. Bandapalli, Ed.). *PLoS One* 9: e112687. <https://doi.org/10.1371/journal.pone.0112687>
- Aguilo F., F. Zhang, A. Sancho, M. Fidalgo, S. Di Cecilia, *et al.*, 2015 Coordination of m6A mRNA Methylation and Gene Transcription by ZFP217 Regulates Pluripotency and Reprogramming. *Cell Stem Cell* 17: 689–704. <https://doi.org/10.1016/j.stem.2015.09.005>
- Aibara S., J. M. B. Gordon, A. S. Riesterer, S. H. McLaughlin, and M. Stewart, 2017 Structural basis for the dimerization of Nab2 generated by RNA binding provides insight into its contribution to both poly(A) tail length determination and transcript compaction in *Saccharomyces cerevisiae*. *Nucleic Acids Res.* 45: 1529–1538. <https://doi.org/10.1093/nar/gkw1224>
- Aitchison J. D., G. Blobel, and M. P. Rout, 1996 Kap104p: A karyopherin involved in the nuclear transport of messenger RNA binding proteins. *Science* (80- ). 274: 624–627. <https://doi.org/10.1126/science.274.5287.624>
- Al-Nabhani M., S. Al-Rashdi, F. Al-Murshedi, A. Al-Kindi, K. Al-Thihli, *et al.*, 2018 Reanalysis of exome sequencing data of intellectual disability samples: Yields and benefits. *Clin. Genet.* <https://doi.org/10.1111/cge.13438>
- Almudi I., M. Corominas, and F. Serras, 2010 Competition between SOCS36E and Drk modulates sevenless receptor tyrosine kinase activity. *J. Cell Sci.* 123: 3857–3862. <https://doi.org/10.1242/jcs.071134>
- Alpert T., K. Straube, F. Carrillo Oesterreich, and K. M. Neugebauer, 2020 Widespread Transcriptional Readthrough Caused by Nab2 Depletion Leads to Chimeric Transcripts with Retained Introns. *Cell Rep.* 33: 108324. <https://doi.org/10.1016/j.celrep.2020.108324>
- Anderson J. T., S. M. Wilson, K. V Datar, and M. S. Swanson, 1993 NAB2: a yeast nuclear polyadenylated RNA-binding protein essential for cell viability. *Mol. Cell. Biol.* 13: 2730–2741. <https://doi.org/10.1128/mcb.13.5.2730>
- Ashburner M., C. A. Ball, J. A. Blake, D. Botstein, H. Butler, *et al.*, 2000 Gene ontology: Tool for the unification of biology. *Nat. Genet.* 25: 25–29.
- Ashley C. T., K. D. Wilkinson, D. Reines, and S. T. Warren, 1993 FMR1 protein: Conserved RNP family domains and selective RNA binding. *Science* (80- ). 262: 563–566. <https://doi.org/10.1126/science.7692601>
- Baejen C., P. Torkler, S. Gressel, K. Essig, J. Söding, *et al.*, 2014 Transcriptome Maps of mRNP Biogenesis Factors Define Pre-mRNA Recognition. *Mol. Cell* 55: 745–757. <https://doi.org/10.1016/j.molcel.2014.08.005>
- Bailey T. L., and C. Elkan, 1994 Fitting a mixture model by expectation maximization to discover motifs in biopolymers. *Proceedings. Int. Conf. Intell. Syst. Mol. Biol.* 2: 28–36.

- Bailey T. L., M. Boden, F. A. Buske, M. Frith, C. E. Grant, *et al.*, 2009 MEME Suite: Tools for motif discovery and searching. *Nucleic Acids Res.* 37: W202–W208. <https://doi.org/10.1093/nar/gkp335>
- Bakthavachalu B., J. Huelsmeier, I. P. Sudhakaran, J. Hillebrand, A. Singh, *et al.*, 2018 RNP-Granule Assembly via Ataxin-2 Disordered Domains Is Required for Long-Term Memory and Neurodegeneration Article RNP-Granule Assembly via Ataxin-2 Disordered Domains Is Required for Long-Term Memory and Neurodegeneration. *Neuron* 98: 754-766.e4. <https://doi.org/10.1016/j.neuron.2018.04.032>
- Banerjee A., K. E. Vest, G. K. Pavlath, and A. H. Corbett, 2017 Nuclear poly(A) binding protein 1 (PABPN1) and Matrin3 interact in muscle cells and regulate RNA processing. *Nucleic Acids Res.* 45: 10706–10725. <https://doi.org/10.1093/nar/gkx786>
- Barbee S. A., P. S. Estes, A. M. Cziko, J. Hillebrand, R. A. Luedeman, *et al.*, 2006 Staufen- and FMRP-Containing Neuronal RNPs Are Structurally and Functionally Related to Somatic P Bodies. *Neuron* 52: 997–1009. <https://doi.org/10.1016/j.neuron.2006.10.028>
- Bardoni B., S. Abekhouk, S. Zongaro, and M. Melko, 2012 Intellectual disabilities, neuronal posttranscriptional RNA metabolism, and RNA-binding proteins: Three actors for a complex scenario, pp. 29–51 in *Progress in Brain Research*, Elsevier B.V.
- Batisse J., C. Batisse, A. Budd, B. Bötcher, and E. Hurt, 2009 Purification of Nuclear Poly(A)-binding Protein Nab2 Reveals Association with the Yeast Transcriptome and a Messenger Ribonucleoprotein Core Structure. *J. Biol. Chem.* 284: 34911–34917. <https://doi.org/10.1074/jbc.M109.062034>
- Bellen H. J., R. W. Levis, G. Liao, Y. He, J. W. Carlson, *et al.*, 2004 The BDGP gene disruption project: Single transposon insertions associated with 40% of *Drosophila* genes. *Genetics* 167: 761–781. <https://doi.org/10.1534/genetics.104.026427>
- Benoit B., G. Mitou, A. Chartier, C. Temme, S. Zaessinger, *et al.*, 2005 An essential cytoplasmic function for the nuclear poly(A) binding protein, PABP2, in poly(A) tail length control and early development in *Drosophila*. *Dev. Cell* 9: 511–522. <https://doi.org/10.1016/j.devcel.2005.09.002>
- Bienkowski R. S., A. Banerjee, J. C. Rounds, J. Rha, O. F. Omotade, *et al.*, 2017 The Conserved, Disease-Associated RNA Binding Protein dNab2 Interacts with the Fragile X Protein Ortholog in *Drosophila* Neurons. *Cell Rep.* 20: 1372–1384. <https://doi.org/10.1016/j.celrep.2017.07.038>
- Bokhoven H. van, 2011 Genetic and epigenetic networks in intellectual disabilities. *Annu. Rev. Genet.* 45: 81–104. <https://doi.org/10.1146/annurev-genet-110410-132512>
- Chelly J., M. Khelifaoui, F. Francis, B. Chérif, and T. Bienvenu, 2006 Genetics and pathophysiology of mental retardation. *Eur. J. Hum. Genet.* 14: 701–713.
- Chen C. Y. A., and A. Bin Shyu, 2014 Emerging mechanisms of mRNP remodeling regulation. *Wiley Interdiscip. Rev. RNA* 5: 713–722. <https://doi.org/10.1002/wrna.1241>
- Connolly J. B., I. J. H. Roberts, J. D. Armstrong, K. Kaiser, M. Forte, *et al.*, 1996 Associative learning disrupted by impaired Gs signaling in *Drosophila* mushroom bodies. *Science* (80-. ). 274: 2104–2107. <https://doi.org/10.1126/science.274.5295.2104>
- Corgiat E. B., S. M. List, J. C. Rounds, A. H. Corbett, and K. H. Moberg, 2020 The RNA binding



protein Nab2 regulates the proteome of the developing *Drosophila* brain. *bioRxiv* 2020.12.10.419846. <https://doi.org/10.1101/2020.12.10.419846>

- Crooks G. E., G. Hon, J. M. Chandonia, and S. E. Brenner, 2004 WebLogo: A sequence logo generator. *Genome Res.* 14: 1188–1190. <https://doi.org/10.1101/gr.849004>
- Dobin A., C. A. Davis, F. Schlesinger, J. Drenkow, C. Zaleski, *et al.*, 2013 STAR: ultrafast universal RNA-seq aligner. *Bioinformatics* 29: 15–21. <https://doi.org/10.1093/bioinformatics/bts635>
- Domanski M., K. Molloy, H. Jiang, B. T. Chait, M. P. Rout, *et al.*, 2012 Improved methodology for the affinity isolation of human protein complexes expressed at near endogenous levels. *Biotechniques* 0: 1–6. <https://doi.org/10.2144/000113864>
- Dominguez D., P. Freese, M. S. Alexis, A. Su, M. Hochman, *et al.*, 2018 Sequence, Structure, and Context Preferences of Human RNA Binding Proteins. *Mol. Cell* 70: 854–867.e9. <https://doi.org/10.1016/j.molcel.2018.05.001>
- Dubnau J., L. Grady, T. Kitamoto, and T. Tully, 2001 Disruption of neurotransmission in *Drosophila* mushroom body blocks retrieval but not acquisition of memory. *Nature* 411: 476–480. <https://doi.org/10.1038/35078077>
- Duncan K., J. G. Umen, and C. Guthrie, 2000 A putative ubiquitin ligase required for efficient mRNA export differentially affects hnRNP transport. *Curr. Biol.* 10: 687–696. [https://doi.org/10.1016/S0960-9822\(00\)00527-3](https://doi.org/10.1016/S0960-9822(00)00527-3)
- Dunnett C. W., 1955 A Multiple Comparison Procedure for Comparing Several Treatments with a Control. *J. Am. Stat. Assoc.* 50: 1096–1121. <https://doi.org/10.1080/01621459.1955.10501294>
- Elden A. C., H.-J. Kim, M. P. Hart, A. S. Chen-Plotkin, B. S. Johnson, *et al.*, 2010 Ataxin-2 intermediate-length polyglutamine expansions are associated with increased risk for ALS. *Nature* 466: 1069–1075. <https://doi.org/10.1038/nature09320>
- Ellis M. C., E. M. O’Neill, and G. M. Rubin, 1993 Expression of *Drosophila* glass protein and evidence for negative regulation of its activity in non-neuronal cells by another DNA-binding protein. *Development* 119: 855–865.
- Eulalio A., I. Behm-Ansmant, D. Schweizer, and E. Izaurralde, 2007 P-Body Formation Is a Consequence, Not the Cause, of RNA-Mediated Gene Silencing. *Mol. Cell. Biol.* 27: 3970–3981. <https://doi.org/10.1128/mcb.00128-07>
- Farny N. G., J. A. Hurt, and P. A. Silver, 2008 Definition of global and transcript-specific mRNA export pathways in metazoans. *Genes Dev.* 22: 66–78. <https://doi.org/10.1101/gad.1616008>
- Fasken M. B., A. H. Corbett, and M. Stewart, 2019 Structure-function relationships in the Nab2 polyadenosine-RNA binding Zn finger protein family. *Protein Sci.* 28: 513–523. <https://doi.org/10.1002/pro.3565>
- Ferris J., H. Ge, L. Liu, and G. Roman, 2006 G(o) signaling is required for *Drosophila* associative learning. *Nat. Neurosci.* 9: 1036–1040. <https://doi.org/10.1038/nn1738>
- Freeman M., 1996 Reiterative use of the EGF receptor triggers differentiation of all cell types in the *Drosophila* eye. *Cell* 87: 651–660. [https://doi.org/10.1016/S0092-8674\(00\)81385-9](https://doi.org/10.1016/S0092-8674(00)81385-9)

- Gai Y., Z. Liu, I. Cervantes-Sandoval, and R. L. Davis, 2016 *Drosophila* SLC22A Transporter Is a Memory Suppressor Gene that Influences Cholinergic Neurotransmission to the Mushroom Bodies. *Neuron* 90: 581–595. <https://doi.org/10.1016/j.neuron.2016.03.017>
- González-Aguilera C., C. Tous, R. Babiano, J. de la Cruz, R. Luna, *et al.*, 2011 Nab2 functions in the metabolism of RNA driven by polymerases II and III. *Mol. Biol. Cell* 22: 2729–40. <https://doi.org/10.1091/mbc.E11-01-0055>
- Goosen N., 2010 Scanning the DNA for damage by the nucleotide excision repair machinery. *DNA Repair (Amst)*. 9: 593–596. <https://doi.org/10.1016/j.dnarep.2010.02.015>
- Grant C. E., T. L. Bailey, and W. S. Noble, 2011 FIMO: Scanning for occurrences of a given motif. *Bioinformatics* 27: 1017–1018. <https://doi.org/10.1093/bioinformatics/btr064>
- Green D. M., K. A. Marfatia, E. B. Crafton, X. Zhang, X. Cheng, *et al.*, 2002 Nab2p is required for poly(A) RNA export in *Saccharomyces cerevisiae* and is regulated by arginine methylation via Hmt1p. *J. Biol. Chem.* 277: 7752–7760. <https://doi.org/10.1074/jbc.M110053200>
- Guisbert K. K., K. Duncan, H. Li, and C. Guthrie, 2005 Functional specificity of shuttling hnRNPs revealed by genome-wide analysis of their RNA binding profiles. *RNA* 11: 383–393. <https://doi.org/10.1261/rna.7234205>
- Gwinn-Hardy K., J. Y. Chen, H. C. Liu, T. Y. Liu, M. Boss, *et al.*, 2000 Spinocerebellar ataxia type 2 with parkinsonism in ethnic Chinese. *Neurology* 55: 800–805. <https://doi.org/10.1212/WNL.55.6.800>
- Hao L. Y., B. I. Giasson, and N. M. Bonini, 2010 DJ-1 is critical for mitochondrial function and rescues PINK1 loss of function. *Proc. Natl. Acad. Sci. U. S. A.* 107: 9747–9752. <https://doi.org/10.1073/pnas.0911175107>
- Hart T., M. Chandrashekar, M. Aregger, Z. Steinhart, K. R. Brown, *et al.*, 2015 High-Resolution CRISPR Screens Reveal Fitness Genes and Genotype-Specific Cancer Liabilities. *Cell* 163: 1515–1526. <https://doi.org/10.1016/j.cell.2015.11.015>
- Hay B. A., T. Wolff, and G. M. Rubin, 1994 Expression of baculovirus P35 prevents cell death in *Drosophila*. *Development* 120: 2121–2129.
- Hector R. E., K. R. Nykamp, S. Dheur, J. T. Anderson, P. J. Non, *et al.*, 2002 Dual requirement for yeast hnRNP Nab2p in mRNA poly(A) tail length control and nuclear export. *EMBO J.* 21: 1800–10. <https://doi.org/10.1093/emboj/21.7.1800>
- Heisenberg M., 2003 Mushroom body memoir: From maps to models. *Nat. Rev. Neurosci.* 4: 266–275. <https://doi.org/10.1038/nrn1074>
- Henning K. A., C. Peterson, R. Legerski, and E. C. Friedberg, 1994 Cloning the *Drosophila* homolog of the xeroderma pigmentosum complementation group C gene reveals homology between the predicted human and *drosophila* polypeptides and that encoded by the yeast RAD4 gene. *Nucleic Acids Res.* 22: 257–261. <https://doi.org/10.1093/nar/22.3.257>
- Hillebrand J., K. Pan, A. Kokaram, S. Barbee, R. Parker, *et al.*, 2010 The Me31B DEAD-Box Helicase Localizes to Postsynaptic Foci and Regulates Expression of a CaMKII Reporter mRNA in Dendrites of *Drosophila* Olfactory Projection Neurons. *Front. Neural Circuits* 4: 121.

<https://doi.org/10.3389/fncir.2010.00121>

- Hoskins R. A., J. W. Carlson, K. H. Wan, S. Park, I. Mendez, *et al.*, 2015 The Release 6 reference sequence of the *Drosophila melanogaster* genome. *Genome Res.* 25: 445–458.  
<https://doi.org/10.1101/gr.185579.114>
- Hudson A. M., and L. Cooley, 2002 A subset of dynamic actin rearrangements in *Drosophila* requires the Arp2/3 complex. *J. Cell Biol.* 156: 677–687. <https://doi.org/10.1083/jcb.200109065>
- Huet F., J. T. Lu, K. V. Myrick, L. R. Baugh, M. A. Crosby, *et al.*, 2002 A deletion-generator compound element allows deletion saturation analysis for genomewide phenotypic annotation. *Proc. Natl. Acad. Sci. U. S. A.* 99: 9948–9953. <https://doi.org/10.1073/pnas.142310099>
- Huynh D. P., H.-T. Yang, H. Vakharia, D. Nguyen, and S. M. Pulst, 2003 Expansion of the polyQ repeat in ataxin-2 alters its Golgi localization, disrupts the Golgi complex and causes cell death. *Hum. Mol. Genet.* 12: 1485–1496. <https://doi.org/10.1093/hmg/ddg175>
- Imbert G., F. Saudou, G. Yvert, D. Devys, Y. Trottier, *et al.*, 1996 Cloning of the gene for spinocerebellar ataxia 2 reveals a locus with high sensitivity to expanded CAG/glutamine repeats. *Nat. Genet.* 14: 285–291. <https://doi.org/10.1038/ng1196-285>
- Inlow J. K., and L. L. Restifo, 2004 Molecular and Comparative Genetics of Mental Retardation. *Genetics* 166: 835–881. <https://doi.org/10.1534/genetics.166.2.835>
- Jalloh B., J. C. Rounds, B. E. Brown, I. J. Kremisky, A. Banerjee, *et al.*, 2020 The Nab2 RNA binding protein promotes sex-specific splicing of Sex lethal in *Drosophila* neuronal tissue. *bioRxiv* 2020.11.13.382168. <https://doi.org/10.1101/2020.11.13.382168>
- Jean S., S. Cox, E. J. Schmidt, F. L. Robinson, and A. Kiger, 2012 Sbf/MTMR13 coordinates PI(3)P and Rab21 regulation in endocytic control of cellular remodeling. *Mol. Biol. Cell* 23: 2723–2740. <https://doi.org/10.1091/mbc.E12-05-0375>
- Jiménez-López D., and P. Guzmán, 2014 Insights into the evolution and domain structure of ataxin-2 proteins across eukaryotes. *BMC Res. Notes* 7: 453. <https://doi.org/10.1186/1756-0500-7-453>
- Kahsai L., and T. Zars, 2011 Learning and memory in *Drosophila*: Behavior, genetics, and neural systems, pp. 139–167 in *International Review of Neurobiology*, Academic Press Inc.
- Kanuka H., T. Hiratou, T. Igaki, H. Kanda, E. Kuranaga, *et al.*, 2005 Gain-of-function screen identifies a role of the Sec61 $\alpha$  translocon in *Drosophila* postmitotic neurotoxicity. *Biochim. Biophys. Acta - Gen. Subj.* 1726: 225–237. <https://doi.org/10.1016/j.bbagen.2005.06.020>
- Kelly S. M., S. A. Pabit, C. M. Kitchen, P. Guo, K. A. Marfatia, *et al.*, 2007 Recognition of polyadenosine RNA by zinc finger proteins. *Proc. Natl. Acad. Sci. U. S. A.* 104: 12306–12311. <https://doi.org/10.1073/pnas.0701244104>
- Kelly S. M., S. W. Leung, L. H. Apponi, A. M. Bramley, E. J. Tran, *et al.*, 2010 Recognition of polyadenosine RNA by the zinc finger domain of nuclear poly(A) RNA-binding protein 2 (Nab2) is required for correct mRNA 3'-end formation. *J. Biol. Chem.* 285: 26022–32. <https://doi.org/10.1074/jbc.M110.141127>
- Kelly S. M., S. W. Leung, C. Pak, A. Banerjee, K. H. Moberg, *et al.*, 2014 A conserved role for the zinc

finger polyadenosine RNA binding protein, ZC3H14, in control of poly(A) tail length. *RNA* 20: 681–8. <https://doi.org/10.1261/rna.043984.113>

- Kelly S. M., R. Bienkowski, A. Banerjee, D. J. Melicharek, Z. A. Brewer, *et al.*, 2016 The *Drosophila* ortholog of the Zc3h14 RNA binding protein acts within neurons to pattern axon projection in the developing brain. *Dev. Neurobiol.* 76: 93–106. <https://doi.org/10.1002/dneu.22301>
- Kelly S. M., A. Elchert, and M. Kahl, 2017 Dissection and immunofluorescent staining of mushroom body and photoreceptor neurons in adult *Drosophila melanogaster* brains. *J. Vis. Exp.* 2017: e56174. <https://doi.org/10.3791/56174>
- Kim M., M. Bellini, and S. Ceman, 2009 Fragile X Mental Retardation Protein FMRP Binds mRNAs in the Nucleus. *Mol. Cell. Biol.* 29: 214–228. <https://doi.org/10.1128/mcb.01377-08>
- Lachkar S., M. Lebois, M. O. Steinmetz, A. Guichet, N. Lal, *et al.*, 2010 *Drosophila* stathmins bind tubulin heterodimers with high and variable stoichiometries. *J. Biol. Chem.* 285: 11667–11680. <https://doi.org/10.1074/jbc.M109.096727>
- Laemmli U. K., 1970 Cleavage of structural proteins during the assembly of the head of bacteriophage T4. *Nature* 227: 680–685. <https://doi.org/10.1038/227680a0>
- Layalle S., E. Coessens, A. Ghysen, and C. Dambly-Chaudière, 2005 Smooth, a hnRNP encoding gene, controls axonal navigation in *Drosophila*. *Genes to Cells* 10: 119–125. <https://doi.org/10.1111/j.1365-2443.2005.00822.x>
- Lee D. C. Y., and J. D. Aitchison, 1999 Kap104p-mediated nuclear import. Nuclear localization signals in mRNA-binding proteins and the role of Ran and RNA. *J. Biol. Chem.* 274: 29031–29037. <https://doi.org/10.1074/jbc.274.41.29031>
- Lee J., E. Yoo, H. Lee, K. Park, J.-H. Hur, *et al.*, 2017 LSM12 and ME31B/DDX6 Define Distinct Modes of Posttranscriptional Regulation by ATAXIN-2 Protein Complex in *Drosophila* Circadian Pacemaker Neurons. *Mol. Cell* 66: 129-140.e7. <https://doi.org/10.1016/j.molcel.2017.03.004>
- Lee J., M. Kim, T. Q. Itoh, and C. Lim, 2018 Ataxin-2: A versatile posttranscriptional regulator and its implication in neural function. *Wiley Interdiscip. Rev. RNA* 9: e1488. <https://doi.org/10.1002/wrna.1488>
- Lee W.-H., E. B. Corgiat, J. C. Rounds, Z. Shepherd, A. H. Corbett, *et al.*, 2020 A Genetic Screen Links the Disease-Associated Nab2 RNA-Binding Protein to the Planar Cell Polarity Pathway in *Drosophila melanogaster*. *G3 GENES, GENOMES, Genet.* <https://doi.org/10.1534/g3.120.401637>
- Lessing D., and N. M. Bonini, 2008 Polyglutamine Genes Interact to Modulate the Severity and Progression of Neurodegeneration in *Drosophila*, (H. Y. Zoghbi, Ed.). *PLoS Biol.* 6: e29. <https://doi.org/10.1371/journal.pbio.0060029>
- Li X., G. Quon, H. D. Lipshitz, and Q. Morris, 2010 Predicting in vivo binding sites of RNA-binding proteins using mRNA secondary structure. *RNA* 16: 1096–1107. <https://doi.org/10.1261/rna.2017210>
- Li J., Y. Chen, X. Xu, J. Jones, M. Tiwari, *et al.*, 2019 HNRNPK maintains epidermal progenitor function through transcription of proliferation genes and degrading differentiation promoting mRNAs. *Nat. Commun.* 10: 1–14. <https://doi.org/10.1038/s41467-019-12238-x>

- Liao Y., G. K. Smyth, and W. Shi, 2014 featureCounts: an efficient general purpose program for assigning sequence reads to genomic features. *Bioinformatics* 30: 923–930. <https://doi.org/10.1093/bioinformatics/btt656>
- Lim C., and R. Allada, 2013 ATAXIN-2 Activates PERIOD Translation to Sustain Circadian Rhythms in *Drosophila*. *Science* (80-. ). 340. <https://doi.org/10.1126/science.1234785>
- Lin D. M., and C. S. Goodman, 1994 Ectopic and increased expression of fasciclin II alters motoneuron growth cone guidance. *Neuron* 13: 507–523. [https://doi.org/10.1016/0896-6273\(94\)90022-1](https://doi.org/10.1016/0896-6273(94)90022-1)
- Love M. I., W. Huber, and S. Anders, 2014 Moderated estimation of fold change and dispersion for RNA-seq data with DESeq2. *Genome Biol.* 15: 550. <https://doi.org/10.1186/s13059-014-0550-8>
- Lu Z., X. Guan, C. A. Schmidt, and A. G. Matera, 2014 RIP-seq analysis of eukaryotic Sm proteins identifies three major categories of Sm-containing ribonucleoproteins. *Genome Biol.* 15: 1–23. <https://doi.org/10.1186/gb-2014-15-1-r7>
- Malmevik J., R. Petri, T. Klussendorf, P. Knauff, M. Åkerblom, *et al.*, 2015 Identification of the miRNA targetome in hippocampal neurons using RIP-seq. *Sci. Rep.* 5: 12609. <https://doi.org/10.1038/srep12609>
- Mandel C. R., Y. Bai, and L. Tong, 2008 Protein factors in pre-mRNA 3'-end processing. *Cell. Mol. Life Sci.* 65: 1099–1122.
- Mangus D. A., N. Amrani, and A. Jacobson, 1998 Pbp1p, a Factor Interacting with *Saccharomyces cerevisiae* Poly(A)-Binding Protein, Regulates Polyadenylation. *Mol. Cell. Biol.* 18: 7383–7396. <https://doi.org/10.1128/mcb.18.12.7383>
- Mangus D. A., M. C. Evans, and A. Jacobson, 2003 Poly(A)-binding proteins: Multifunctional scaffolds for the post-transcriptional control of gene expression. *Genome Biol.* 4: 1–14. <https://doi.org/10.1186/gb-2003-4-7-223>
- Mangus D. A., M. M. Smith, J. M. McSweeney, and A. Jacobson, 2004 Identification of Factors Regulating Poly(A) Tail Synthesis and Maturation. *Mol. Cell. Biol.* 24: 4196–4206. <https://doi.org/10.1128/mcb.24.10.4196-4206.2004>
- Maulik P. K., M. N. Mascarenhas, C. D. Mathers, T. Dua, and S. Saxena, 2011 Prevalence of intellectual disability: A meta-analysis of population-based studies. *Res. Dev. Disabil.* 32: 419–436.
- McCann C., E. E. Holohan, S. Das, A. Dervan, A. Larkin, *et al.*, 2011 The Ataxin-2 protein is required for microRNA function and synapse-specific long-term olfactory habituation. *Proc. Natl. Acad. Sci. U. S. A.* 108: E655-62. <https://doi.org/10.1073/pnas.1107198108>
- Merino M. M., C. Rhiner, M. Portela, and E. Moreno, 2013 “Fitness fingerprints” mediate physiological culling of unwanted neurons in *drosophila*. *Curr. Biol.* 23: 1300–1309. <https://doi.org/10.1016/j.cub.2013.05.053>
- Mi H., A. Muruganujan, D. Ebert, X. Huang, and P. D. Thomas, 2019 PANTHER version 14: more genomes, a new PANTHER GO-slim and improvements in enrichment analysis tools. *Nucleic Acids Res.* 47: 419–426. <https://doi.org/10.1093/nar/gky1038>
- Moore M. J., 2005 From birth to death: The complex lives of eukaryotic mRNAs. *Science* (80-. ). 309:

1514–1518. <https://doi.org/10.1126/science.1111443>

- Moressis A., A. R. Friedrich, E. Pavlopoulos, R. L. Davis, and E. M. C. Skoulakis, 2009 A dual role for the adaptor protein DRK in *Drosophila* olfactory learning and memory. *J. Neurosci.* 29: 2611–2625. <https://doi.org/10.1523/JNEUROSCI.3670-08.2009>
- Morgan M., 2018 BiocManager: Access the Bioconductor Project Package Repository
- Morris K. J., and A. H. Corbett, 2018 The polyadenosine RNA-binding protein ZC3H14 interacts with the THO complex and coordinately regulates the processing of neuronal transcripts. *Nucleic Acids Res.* 46: 6561–6575. <https://doi.org/10.1093/nar/gky446>
- Müller-McNicoll M., and K. M. Neugebauer, 2013 How cells get the message: Dynamic assembly and function of mRNA-protein complexes. *Nat. Rev. Genet.* 14: 275–287. <https://doi.org/10.1038/nrg3434>
- Najmabadi H., H. Hu, M. Garshasbi, T. Zemojtel, S. S. Abedini, *et al.*, 2011 Deep sequencing reveals 50 novel genes for recessive cognitive disorders. *Nature* 478: 57–63. <https://doi.org/10.1038/nature10423>
- Nakamura A., R. Amikura, K. Hanyu, and S. Kobayashi, 2001 Me31B silences translation of oocyte-localizing RNAs through the formation of cytoplasmic RNP complex during *Drosophila* oogenesis. *Development* 128: 3233–3242.
- Oortveld M. A. W., S. Keerthikumar, M. Oti, B. Nijhof, A. C. Fernandes, *et al.*, 2013 Human Intellectual Disability Genes Form Conserved Functional Modules in *Drosophila*, (J. Flint, Ed.). *PLoS Genet.* 9: e1003911. <https://doi.org/10.1371/journal.pgen.1003911>
- Ostrowski L. A., A. C. Hall, and K. Mekhail, 2017 Ataxin-2: From RNA control to human health and disease. *Genes (Basel)*. 8: 2–21.
- Oswald M. C. W., P. S. Brooks, M. F. Zwart, A. Mukherjee, R. J. H. West, *et al.*, 2018 Reactive oxygen species regulate activity-dependent neuronal plasticity in *Drosophila*. *Elife* 7. <https://doi.org/10.7554/eLife.39393>
- Pak C., M. Garshasbi, K. Kahrizi, C. Gross, L. H. Apponi, *et al.*, 2011 Mutation of the conserved polyadenosine RNA binding protein, ZC3H14/dNab2, impairs neural function in *Drosophila* and humans. *Proc. Natl. Acad. Sci. U. S. A.* 108: 12390–5. <https://doi.org/10.1073/pnas.1107103108>
- Park H., H. J. Kim, and B. S. Jeon, 2015 Parkinsonism in spinocerebellar ataxia. *Biomed Res. Int.* 2015.
- Parks A. L., K. R. Cook, M. Belvin, N. A. Dompe, R. Fawcett, *et al.*, 2004 Systematic generation of high-resolution deletion coverage of the *Drosophila melanogaster* genome. *Nat. Genet.* 36: 288–292. <https://doi.org/10.1038/ng1312>
- Patterson S., How To Focus Stack Images In Photoshop. [photoshopessentials.com](https://photoshopessentials.com).
- Pulst S. M., A. Nechiporuk, T. Nechiporuk, S. Gispert, X. N. Chen, *et al.*, 1996 Moderate expansion of a normally biallelic trinucleotide repeat in spinocerebellar ataxia type. *Nat. Genet.* 14: 269–276. <https://doi.org/10.1038/ng1196-269>
- R Core Team, 2019 R: A Language and Environment for Statistical Computing

- R Studio Team, 2018 RStudio: Integrated Development Environment for R
- Ragab A., E. C. Thompson, and A. A. Travers, 2006 High mobility group proteins HMGD and HMGZ interact genetically with the Brahma chromatin remodeling complex in *Drosophila*. *Genetics* 172: 1069–1078. <https://doi.org/10.1534/genetics.105.049957>
- Rha J., S. K. Jones, and A. H. Corbett, 2017a ZC3H14, pp. 1–7 in *Encyclopedia of Signaling Molecules*, edited by Choi S. Springer New York, New York, NY.
- Rha J., S. K. Jones, J. Fidler, A. Banerjee, S. W. Leung, *et al.*, 2017b The RNA-binding protein, ZC3H14, is required for proper poly(A) tail length control, expression of synaptic proteins, and brain function in mice. *Hum. Mol. Genet.* 26: 3663–3681. <https://doi.org/10.1093/hmg/ddx248>
- Robinson J. T., H. Thorvaldsdóttir, W. Winckler, M. Guttman, E. S. Lander, *et al.*, 2011 Integrative genomics viewer. *Nat. Biotechnol.* 29: 24–26.
- Rodal A. A., A. D. Blunk, Y. Akbergenova, R. A. Jorquera, L. K. Buhl, *et al.*, 2011 A presynaptic endosomal trafficking pathway controls synaptic growth signaling. *J. Cell Biol.* 193: 201–217. <https://doi.org/10.1083/jcb.201009052>
- Rodriguez-Lanetty M., *Trizol/RNeasy hybrid RNA extraction protocol*.
- Rørth P., 1996 A modular misexpression screen in *Drosophila* detecting tissue-specific phenotypes. *Proc. Natl. Acad. Sci. U. S. A.* 93: 12418–12422. <https://doi.org/10.1073/pnas.93.22.12418>
- Rørth P., K. Szabo, A. Bailey, T. Lavery, J. Rehm, *et al.*, 1998 Systematic gain-of-function genetics in *Drosophila*. *Development* 125: 1049–1057.
- Rothman K. J., 1990 No adjustments are needed for multiple comparisons. *Epidemiology* 1: 43–6.
- Rueden C. T., J. Schindelin, M. C. Hiner, B. E. DeZonia, A. E. Walter, *et al.*, 2017 ImageJ2: ImageJ for the next generation of scientific image data. *BMC Bioinformatics* 18: 529. <https://doi.org/10.1186/s12859-017-1934-z>
- Sanpei K., H. Takano, S. Igarashi, T. Sato, M. Oyake, *et al.*, 1996 Identification of the spinocerebellar ataxia type 2 gene using a direct identification of repeat expansion and cloning technique, DIRECT. *Nat. Genet.* 14: 277–284. <https://doi.org/10.1038/ng1196-277>
- Satterfield T. F., S. M. Jackson, and L. J. Pallanck, 2002 A *Drosophila* Homolog of the Polyglutamine Disease Gene SCA2 Is a Dosage-Sensitive Regulator of Actin Filament Formation. *Genetics* 162: 1687–1702.
- Schindelin J., I. Arganda-Carreras, E. Frise, V. Kaynig, M. Longair, *et al.*, 2012 Fiji: An open-source platform for biological-image analysis. *Nat. Methods* 9: 676–682.
- Schmid M., P. Olszewski, V. Pelechano, I. Gupta, L. M. Steinmetz, *et al.*, 2015 The Nuclear PolyA-Binding Protein Nab2p Is Essential for mRNA Production. *Cell Rep.* 12: 128–139. <https://doi.org/10.1016/j.celrep.2015.06.008>
- Schneider C. A., W. S. Rasband, and K. W. Eliceiri, 2012 NIH Image to ImageJ: 25 years of image analysis. *Nat. Methods* 9: 671–675.
- Schoenherr J. A., J. M. Drennan, J. S. Martinez, M. R. Chikka, M. C. Hall, *et al.*, 2012 *Drosophila*

Activated Cdc42 Kinase Has an Anti-Apoptotic Function, (H. Steller, Ed.). PLoS Genet. 8: e1002725. <https://doi.org/10.1371/journal.pgen.1002725>

- Slowikowski K., 2019 ggrepel: Automatically Position Non-Overlapping Text Labels with “ggplot2”
- Soucek S., Y. Zeng, D. L. Bellur, M. Bergkessel, K. J. Morris, *et al.*, 2016 The Evolutionarily-conserved Polyadenosine RNA Binding Protein, Nab2, Cooperates with Splicing Machinery to Regulate the Fate of pre-mRNA. Mol. Cell. Biol. 36: 2697–2714. <https://doi.org/10.1128/MCB.00402-16>
- Stewart M., 2019 Polyadenylation and nuclear export of mRNAs. J. Biol. Chem. 294: 2977–2987. <https://doi.org/10.1074/jbc.REV118.005594>
- Sudhakaran I. P., J. Hillebrand, A. Dervan, S. Das, E. E. Holohan, *et al.*, 2014 FMRP and Ataxin-2 function together in long-term olfactory habituation and neuronal translational control. Proc Natl Acad Sci U S A 111: E99–E108. <https://doi.org/10.1073/pnas.1309543111>
- Takemura S. ya, Y. Aso, T. Hige, A. Wong, Z. Lu, *et al.*, 2017 A connectome of a learning and memory center in the adult Drosophila brain. Elife 6. <https://doi.org/10.7554/eLife.26975>
- Taliaferro J. M., N. J. Lambert, P. H. Sudmant, D. Dominguez, J. J. Merkin, *et al.*, 2016 RNA Sequence Context Effects Measured In Vitro Predict In Vivo Protein Binding and Regulation. Mol. Cell 64: 294–306. <https://doi.org/10.1016/j.molcel.2016.08.035>
- Tamanini F., C. Bontekoe, C. E. Bakker, L. Van Unen, B. Anar, *et al.*, 1999 Different targets for the fragile X-related proteins revealed by their distinct nuclear localizations. Hum. Mol. Genet. 8: 863–869. <https://doi.org/10.1093/hmg/8.5.863>
- Tan L., K. X. Zhang, M. Y. Pecot, S. Nagarkar-Jaiswal, P. T. Lee, *et al.*, 2015 Ig Superfamily Ligand and Receptor Pairs Expressed in Synaptic Partners in Drosophila. Cell 163: 1756–1769. <https://doi.org/10.1016/j.cell.2015.11.021>
- Tassé M. J., R. Luckasson, and R. L. Schalock, 2016 The relation between intellectual functioning and adaptive behavior in the diagnosis of intellectual disability. Intellect. Dev. Disabil. 54: 381–390. <https://doi.org/10.1352/1934-9556-54.6.381>
- The Gene Ontology Consortium, 2019 The Gene Ontology Resource: 20 years and still GOing strong. Nucleic Acids Res. 47: D330–D338. <https://doi.org/10.1093/nar/gky1055>
- Thurmond J., J. L. Goodman, V. B. Strelets, H. Attrill, L. S. Gramates, *et al.*, 2018 FlyBase 2.0: the next generation. Nucleic Acids Res. 47: 759–765. <https://doi.org/10.1093/nar/gky1003>
- Tuck A. C., and D. Tollervey, 2013 A transcriptome-wide atlas of RNP composition reveals diverse classes of mRNAs and lncRNAs. Cell 154: 996–1009. <https://doi.org/10.1016/j.cell.2013.07.047>
- Velichkova M., J. Juan, P. Kadandale, S. Jean, I. Ribeiro, *et al.*, 2010 Drosophila Mtm and class II PI3K coregulate a PI(3)P pool with cortical and endolysosomal functions. J. Cell Biol. 190: 407–425. <https://doi.org/10.1083/jcb.200911020>
- Verkerk A. J. M. H., M. Pieretti, J. S. Sutcliffe, Y. H. Fu, D. P. A. Kuhl, *et al.*, 1991 Identification of a gene (FMR-1) containing a CGG repeat coincident with a breakpoint cluster region exhibiting length variation in fragile X syndrome. Cell 65: 905–914. [https://doi.org/10.1016/0092-8674\(91\)90397-H](https://doi.org/10.1016/0092-8674(91)90397-H)



- Verma V., A. Paul, A. A. Vishwanath, B. Vaidya, and J. P. Clement, 2019 Understanding intellectual disability and autism spectrum disorders from common mouse models: Synapses to behaviour. *Open Biol.* 9. <https://doi.org/10.1098/rsob.180265>
- Vest K. E., B. L. Phillips, A. Banerjee, L. H. Apponi, E. B. Dammer, *et al.*, 2017 Novel mouse models of oculopharyngeal muscular dystrophy (OPMD) reveal early onset mitochondrial defects and suggest loss of PABPN1 may contribute to pathology. *Hum. Mol. Genet.* 26: 3235–3252. <https://doi.org/10.1093/hmg/ddx206>
- Vissers L. E. L. M., C. Gilissen, and J. A. Veltman, 2016 Genetic studies in intellectual disability and related disorders. *Nat. Rev. Genet.* 17: 9–18.
- Wan L., T. C. Dockendorff, T. A. Jongens, and G. Dreyfuss, 2000 Characterization of dFMR1, a *Drosophila melanogaster* Homolog of the Fragile X Mental Retardation Protein. *Mol. Cell. Biol.* 20: 8536–8547. <https://doi.org/10.1128/mcb.20.22.8536-8547.2000>
- Wickham H., 2016 *ggplot2: Elegant Graphics for Data Analysis*. Springer-Verlag New York.
- Wigington C. P., K. J. Morris, L. E. Newman, and A. H. Corbett, 2016 The Polyadenosine RNA-binding Protein, Zinc Finger Cys 3 His Protein 14 (ZC3H14), Regulates the Pre-mRNA Processing of a Key ATP Synthase Subunit mRNA \* □ S. *Publ. JBC Pap. Press.* <https://doi.org/10.1074/jbc.M116.754069>
- Williamson W. R., and P. R. Hiesinger, 2010 Preparation of developing and adult *Drosophila* brains and retinæ for live imaging. *J. Vis. Exp.* e1936. <https://doi.org/10.3791/1936>
- Wolff T., and D. F. Ready, 1991 *The beginning of pattern formation in the Drosophila compound eye: the morphogenetic furrow and the second mitotic wave.*
- Yagi R., Y. Mabuchi, M. Mizunami, and N. K. Tanaka, 2016 Convergence of multimodal sensory pathways to the mushroom body calyx in *Drosophila melanogaster*. *Sci. Rep.* 6. <https://doi.org/10.1038/srep29481>
- Yang Z., H. J. Edenberg, and R. L. Davis, 2005 Isolation of mRNA from specific tissues of *Drosophila* by mRNA tagging. *Nucleic Acids Res.* 33: e148–e148. <https://doi.org/10.1093/nar/gni149>
- Yang Q., X. F. Zhang, T. D. Pollard, and P. Forscher, 2012 Arp2/3 complex-dependent actin networks constrain myosin II function in driving retrograde actin flow. *J. Cell Biol.* 197: 939–956. <https://doi.org/10.1083/jcb.201111052>
- Yates A. D., P. Achuthan, W. Akanni, J. Allen, J. Allen, *et al.*, 2020 Ensembl 2020. *Nucleic Acids Res.* 48. <https://doi.org/10.1093/nar/gkz966>
- Yokoshi M., Q. Li, M. Yamamoto, H. Okada, Y. Suzuki, *et al.*, 2014 Direct Binding of Ataxin-2 to Distinct Elements in 3' UTRs Promotes mRNA Stability and Protein Expression. *Mol. Cell* 55: 186–198. <https://doi.org/10.1016/J.MOLCEL.2014.05.022>
- Zhang Y., J. Ling, C. Yuan, R. Dubruille, and P. Emery, 2013 A Role for *Drosophila* ATX2 in Activation of PER Translation and Circadian Behavior. *Science* (80-. ). 340.
- Zhang Y., L. Zhang, X. Tang, S. R. Bhardwaj, J. Ji, *et al.*, 2016 MTV, an ssDNA Protecting Complex Essential for Transposon-Based Telomere Maintenance in *Drosophila*, (G. Bosco, Ed.). *PLOS*

Genet. 12: e1006435. <https://doi.org/10.1371/journal.pgen.1006435>

Zhao J., T. K. Ohsumi, J. T. Kung, Y. Ogawa, D. J. Grau, *et al.*, 2010 Genome-wide Identification of Polycomb-Associated RNAs by RIP-seq. *Mol. Cell* 40: 939–953.

<https://doi.org/10.1016/j.molcel.2010.12.011>

Zwarts L., L. Vanden Broeck, E. Cappuyns, J. F. Ayroles, M. M. Magwire, *et al.*, 2015 The genetic basis of natural variation in mushroom body size in *Drosophila melanogaster*. *Nat. Commun.* 6: 1–11. <https://doi.org/10.1038/ncomms10115>

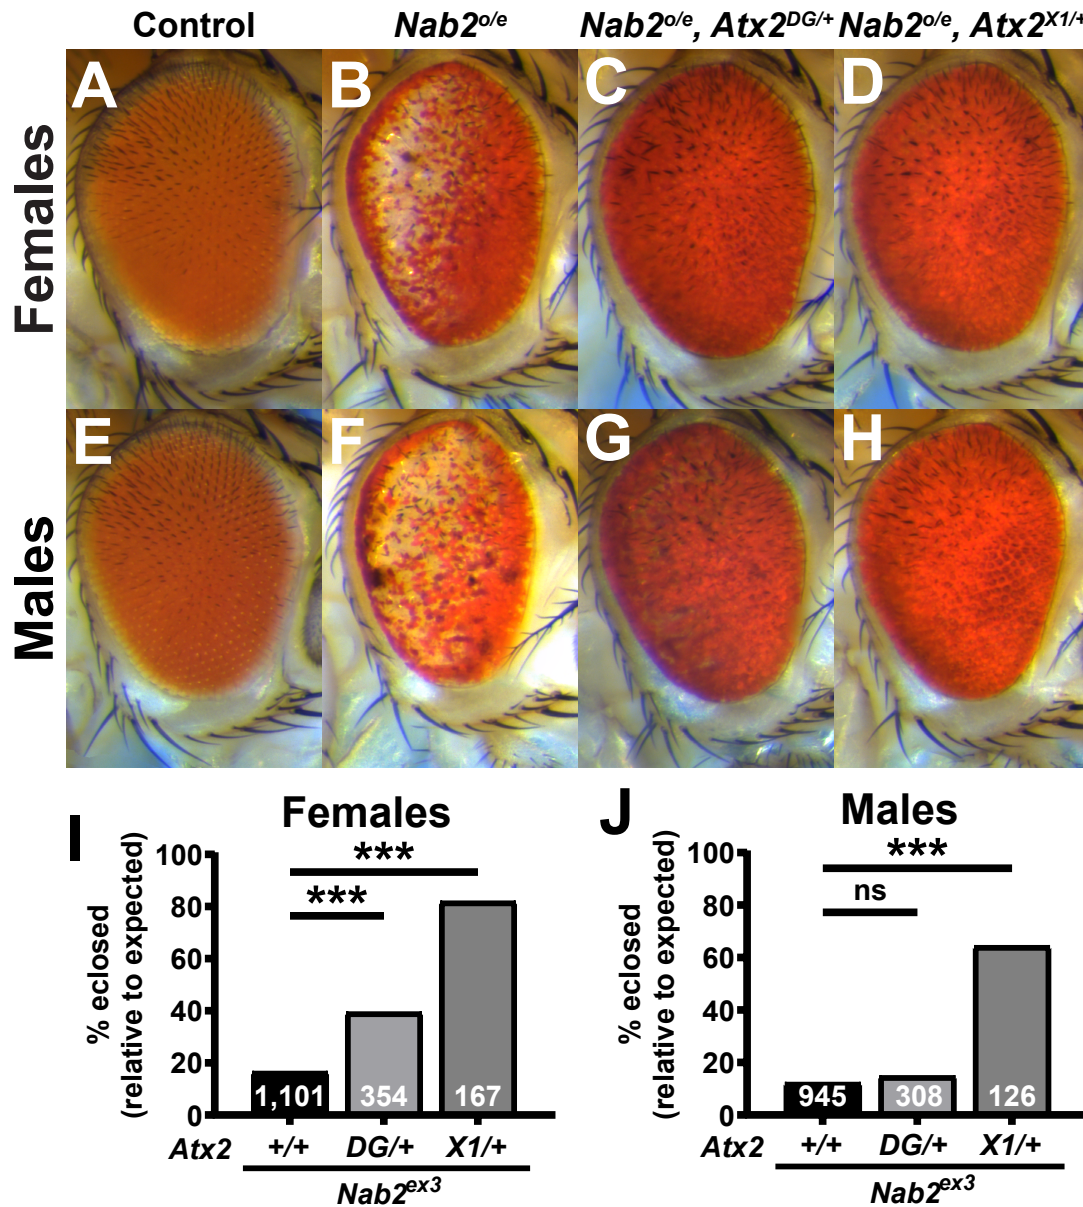

**Figure 1. Loss-of-function alleles of *Atx2* suppress effects of *Nab2* misexpression in female and male *Drosophila*.** Compared to (A) the uniform color and regimented ommatidial structure of the *Drosophila* eye in control females expressing the fated-eye-cell-specific *GMR-Gal4* driver alone, (B) overexpression of endogenous *Nab2* with *GMR-Gal4* (*Nab2<sup>o/e</sup>*) induces posterior pigment loss, sporadic blackened patches, and ommatidial disorder or “roughness”. Heterozygosity for either of two *Atx2* loss-of-function alleles, (C) *Atx2<sup>DG08112/+</sup>* or (D) *Atx2<sup>X1/+</sup>*, dominantly suppresses the pigment loss and blackened patch phenotype, with limited impact on roughness. (E-H) These genetic relationships are also observed in eyes in males. (I, J) Flies lacking functional endogenous *Nab2*, *Nab2<sup>ex3</sup>* homozygotes, demonstrate dramatically decreased adult viability, as quantified by the percentage of flies reaching pupal eclosion and adulthood out of the amount expected by Mendelian inheritance. (I) In females, both loss-of-function alleles of *Atx2* significantly suppress this effect, partially rescuing viability; (J) in males, only *Atx2<sup>X1/+</sup>* suppresses. Sample sizes (n) are reported in each bar and include all F1 progeny scored, including genetically distinct siblings of the genotype of interest used to calculate % eclosed (relative to expected). Fisher’s Exact Test (two-sided) was used to assess statistical significance. ns=not significant, \*\*\*= $p < 0.001$ .

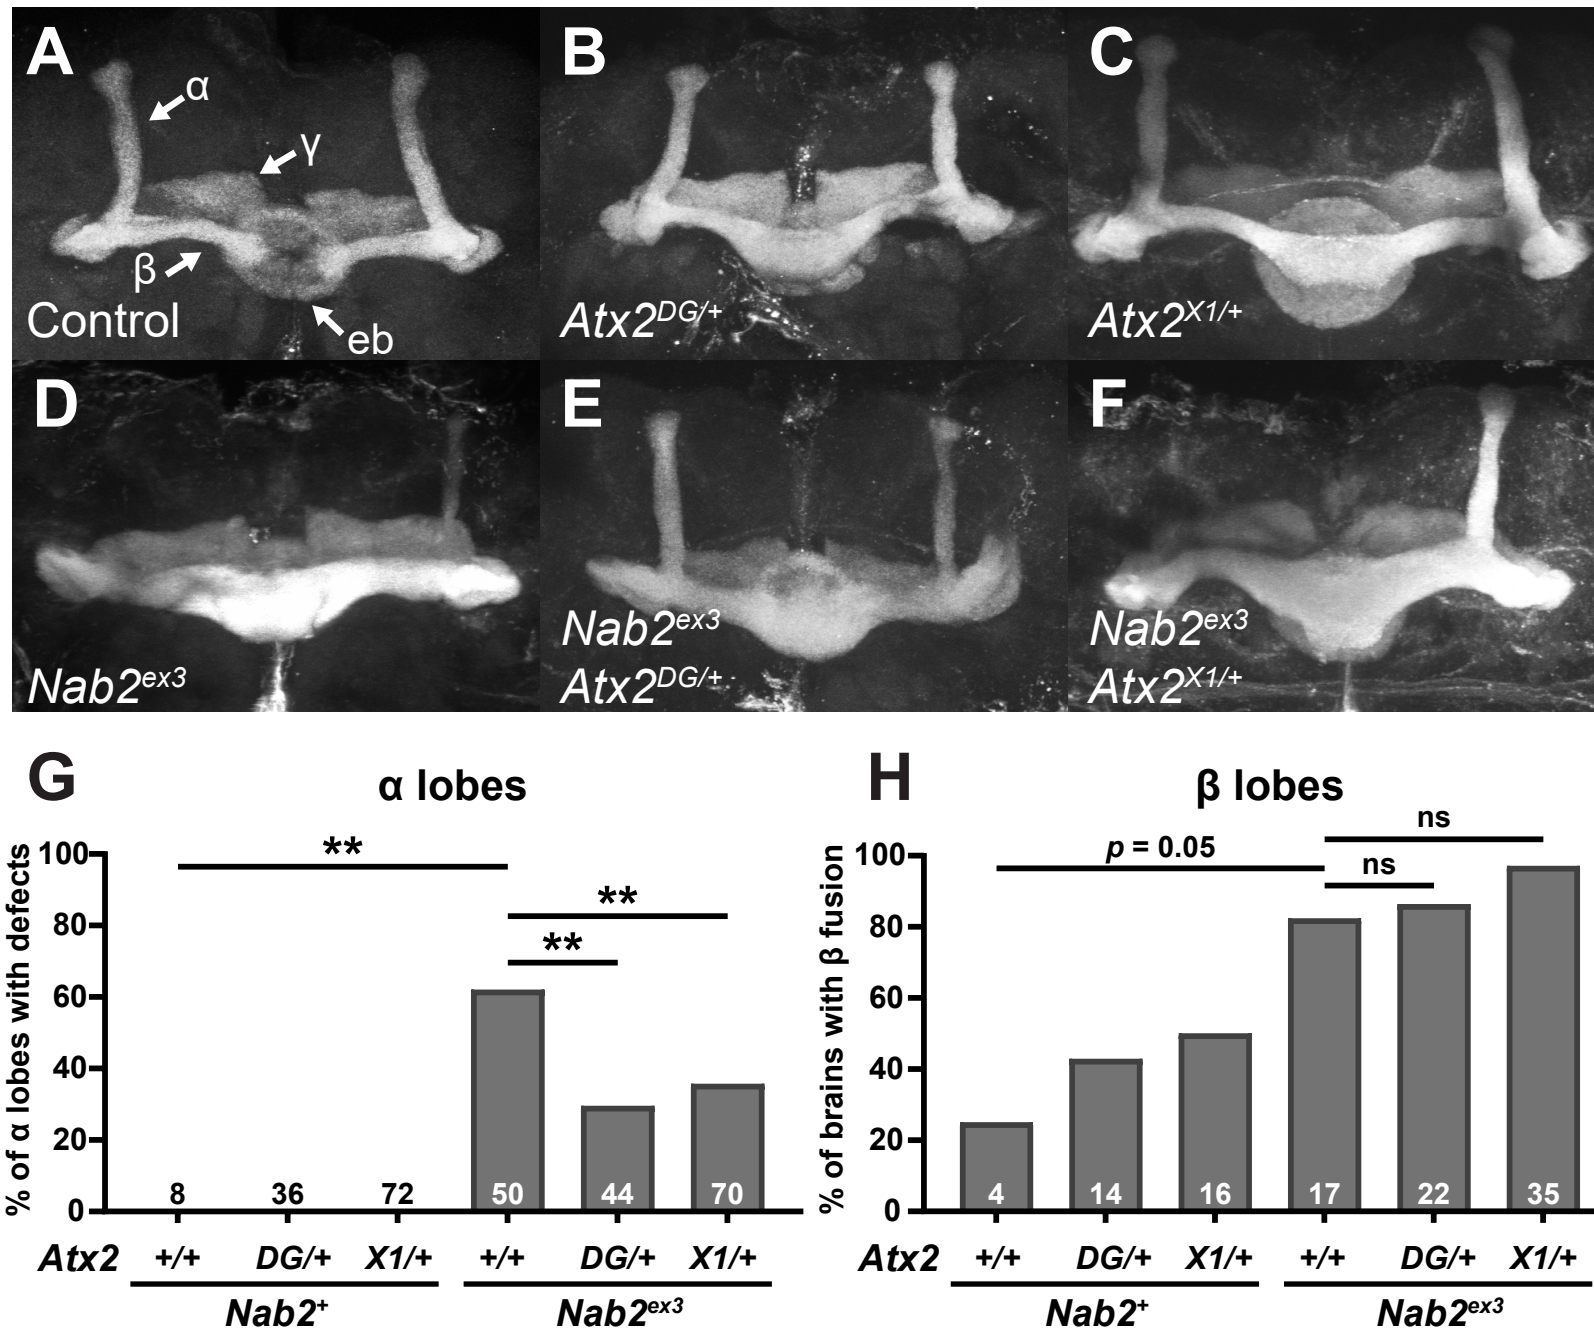

**Figure 2. Loss-of-function alleles of *Atx2* specifically suppress axon morphology defects in *Nab2<sup>ex3</sup>* mushroom body  $\alpha$ , but not  $\beta$ , lobes.** (A) In a representative *Nab2<sup>ex41</sup>* control brain, Fasciclin 2 (Fas2)-marked axons from some Kenyon cells of the mushroom body bifurcate and project dorsally into  $\alpha$  lobes and medially into  $\beta$  lobes. Fas2 also marks mushroom body  $\gamma$  lobes and the ellipsoid body (eb) (white arrows). Representative images show heterozygosity for (B) *Atx2<sup>DG08112/+</sup>* or (C) *Atx2<sup>X1/+</sup>* induces over-projection or “fusion” of  $\beta$  lobes, while (D) homozygosity for the *Nab2* null allele *Nab2<sup>ex3</sup>* induces both  $\beta$  lobe fusion and the thinning or complete absence of  $\alpha$  lobes. Heterozygosity for either (E) *Atx2<sup>DG08112/+</sup>* or (F) *Atx2<sup>X1/+</sup>* in combination with *Nab2<sup>ex3</sup>* partially restores proper  $\alpha$  lobe morphology and, as quantified in (G), significantly suppresses the penetrance of  $\alpha$  lobe defects compared to *Nab2<sup>ex3</sup>* alone. (H) By comparison, as quantified in (H), these *Atx2* alleles neither suppress nor enhance the penetrance of  $\beta$  lobe defects compared to *Nab2<sup>ex3</sup>* alone. Sample sizes (n) are reported in each bar and quantify, for each genotype, the total number of  $\alpha$  lobes scored for defects and the total number of brains scored for  $\beta$  lobe fusion. Fisher’s Exact Test (two-tailed) was used to assess statistical significance. ns=not significant, \*\*= $p \leq 0.01$ .

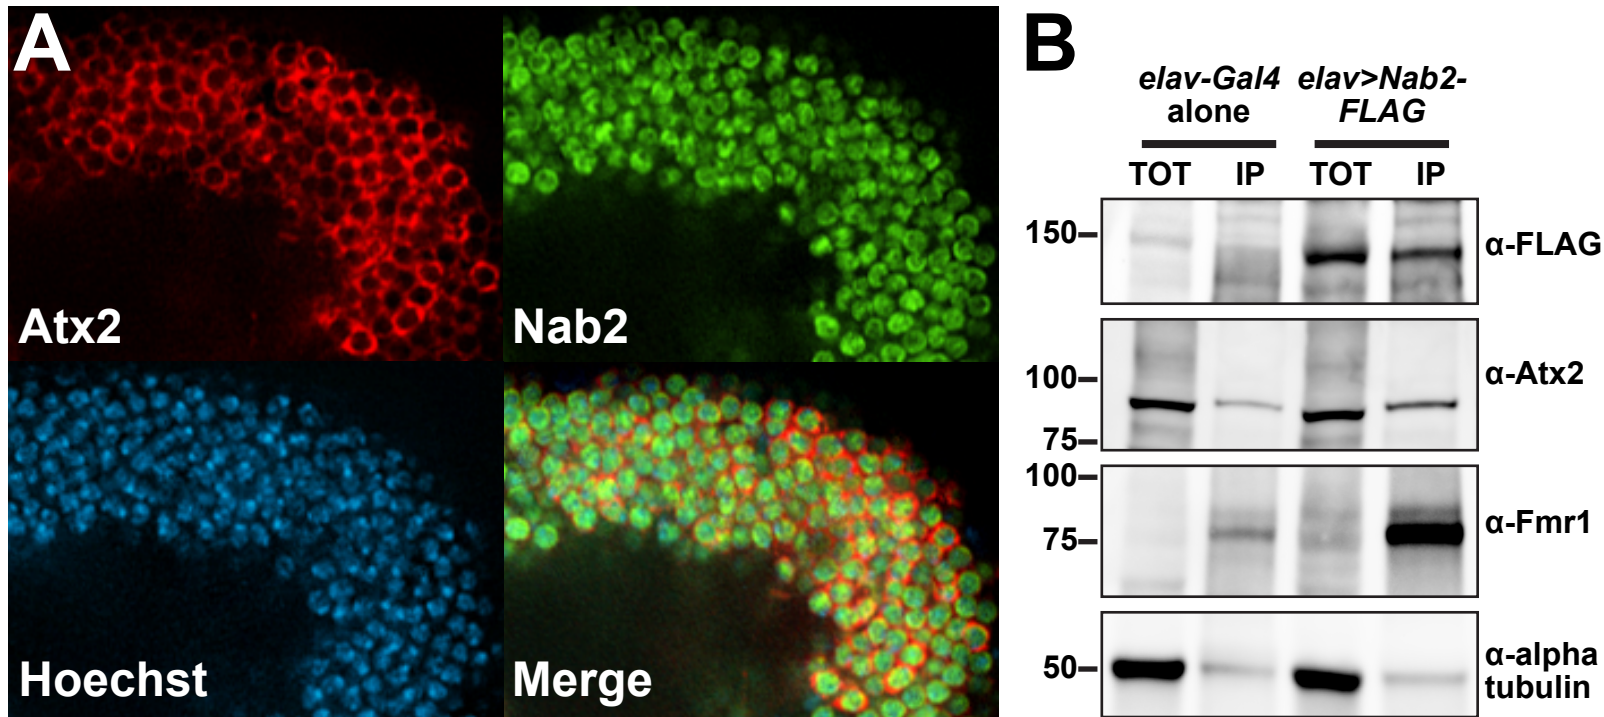

**Figure 3. Nab2 and Atx2 primarily localize to different cellular compartments and show limited physical association in brain neurons.** (A) To specifically assess protein localization in mushroom body neurons, tagged transgenic copies of Atx2 and Nab2 (Atx2-3xFLAG and Nab2-YFP) were expressed in female brains under the MB-specific *OK107-Gal4*. Kenyon cell soma, the cell bodies of the MBs, are shown for a representative brain. False-colored panels show fluorescence corresponding to  $\alpha$ -FLAG (red, Atx2-3xFLAG),  $\alpha$ -GFP (green, Nab2-YFP), Hoechst 33342 (blue, nuclei), and a merge of all three channels. Nab2 is localized primarily to the nuclei at steady state based on overlap with Hoechst 33342 signal, and Atx2 localizes primarily in the surrounding cytoplasm. (B) To test for physical association between Nab2 and Atx2 in brain neurons, lysates of female *Drosophila* heads, either *elav-Gal4* alone controls or *elav>Nab2-FLAG*, were subjected to co-immunoprecipitation using  $\alpha$ -FLAG. For both genotypes, Input samples (TOT) represent 6.25% of assayed lysate and immunoprecipitation (IP) samples represent 25% of total samples eluted from  $\alpha$ -FLAG beads. Samples were resolved via gel electrophoresis and analyzed by immunoblotting, probing with antibodies against FLAG, Atx2, Fmr1 (a positive control), or alpha tubulin (a negative control). Atx2 associates weakly with Nab2 based on its enrichment in IP samples; this association is less robust than that between Nab2 and positive control Fmr1.

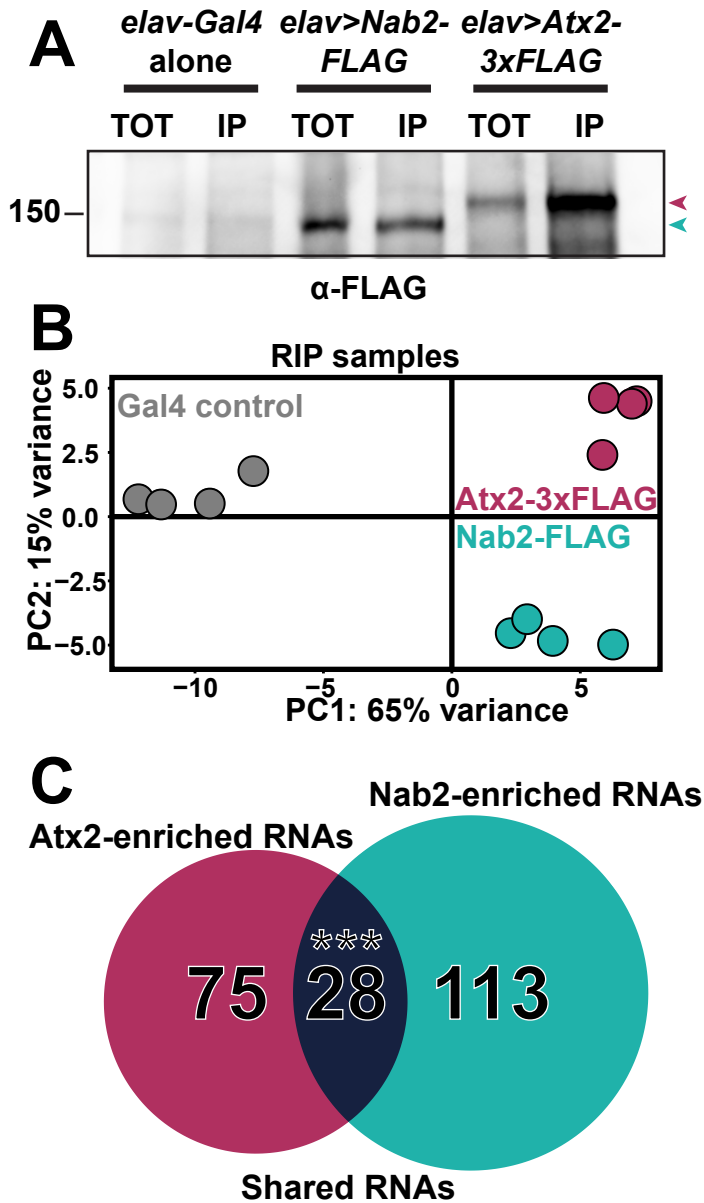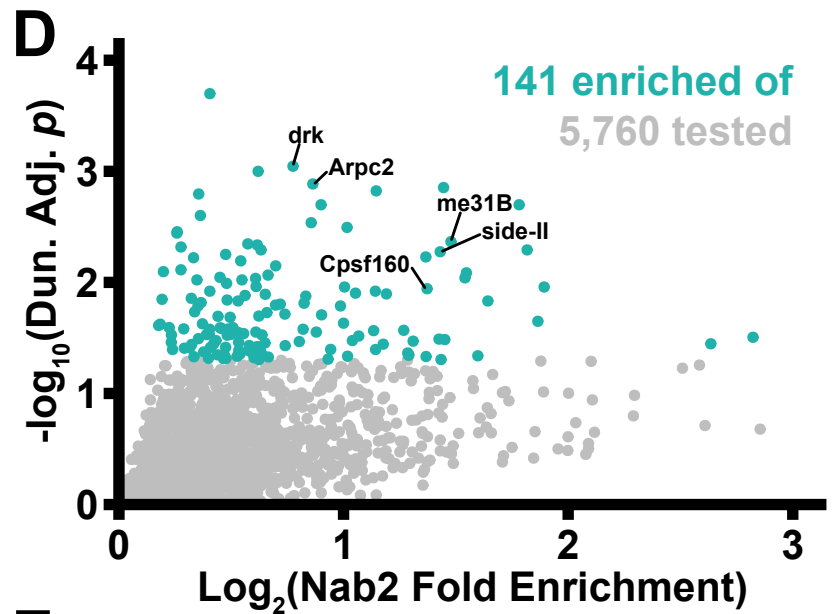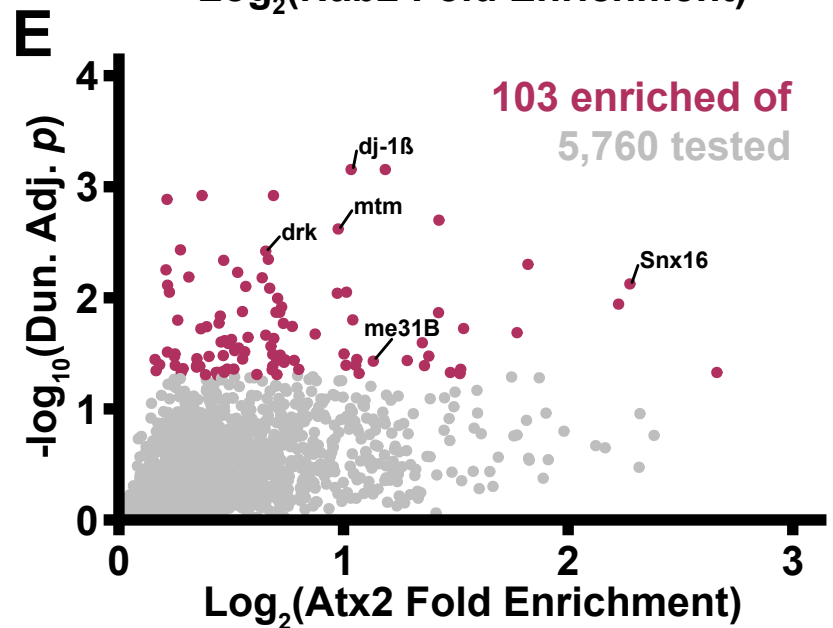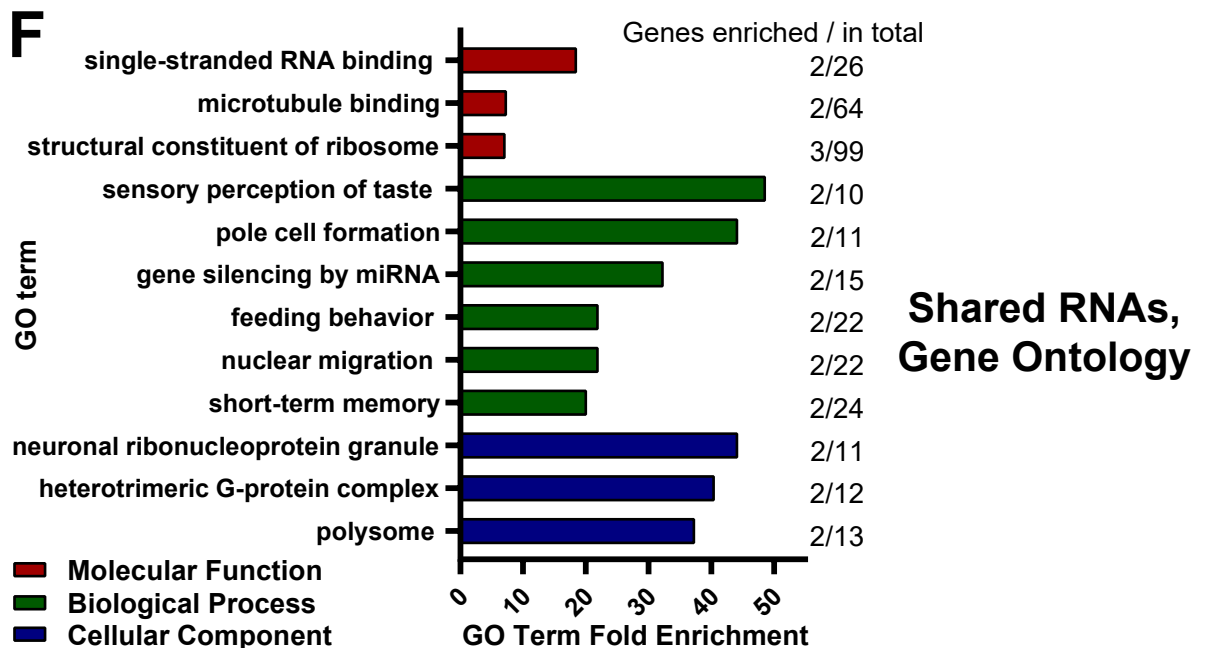

**Figure 4. RIP-Seq reveals overlapping sets of transcripts associate with Nab2-FLAG and Atx2-3xFLAG in brain neurons.** (A) Lysates from heads of female adult flies expressing either pan-neuronal *elav-Gal4* alone as a control, *elav>Nab2-FLAG*, or *elav>Atx2-3xFLAG* were subjected to  $\alpha$ -FLAG immunoprecipitation and immunoblotting to test IP efficacy. Input samples (TOT) represent ~6.25% of total assayed lysates and immunoprecipitation samples (IP) represent 25% of total samples eluted from  $\alpha$ -FLAG beads. Both epitope-tag samples show robust immunoreactivity to  $\alpha$ -FLAG in TOT and IP (arrowheads), indicating effective transgene expression and successful tagged-protein enrichment by IP. (B) Principal component analysis of 12 sequenced RNA IP samples reveals high intra-genotype reproducibility. Comparison of principal component 1 (PC1) and principal component 2 (PC2) demonstrates Nab-FLAG (teal) and Atx2-3xFLAG (maroon) samples differ more from Gal4 controls (gray) than from one another, as predicted. (C) Venn diagram of Nab2-enriched and Atx2-enriched RNAs identified by RIP-Seq, revealing that 28 shared transcripts associate with both RBPs, a significant overlap according to the hypergeometric test ( $***=p<0.001$ ). (D-E) Scatter plot of all transcripts within the 5,760 of the testable set with positive (D)  $\log_2(\text{Nab2 Fold Enrichment})$  or (E)  $\log_2(\text{Atx2 Fold Enrichment})$  values. *Fold Enrichment* values quantify how effectively a transcript was enriched by IP and are derived by calculating IP/Input (i.e. percent input) values for control and epitope-tag samples and setting the average of control values to 1 (i.e. 0 on the logarithmic scale used here). Y-axes display results of significance testing, conducted by gene-by-gene one-way ANOVA, Dunnett's post-hoc test, and within-gene multiple hypothesis testing adjustment (*Dun. Adj. p*). Statistically significant transcripts (*Dun. Adj. p* < 0.05) are colored. On each plot, labels identify three transcripts among the "top" (see *Results* for details) RBP-specific RBP-associated transcripts and two transcripts (*drk*, *me31B*) among the shared RBP-associated transcripts. (F) The independent *Molecular Function* (red), *Biological Process* (green), and *Cellular Component* (blue) Gene Ontology (GO) terms most overrepresented among the shared Nab2- and Atx2-associated transcripts as compared to the entire testable transcript set. GO term independence was determined by "Hierarchical Selection" (see *Methods*). The number of GO term members within the shared RBP-associated transcripts and within the entire testable transcript set (*Genes enriched / in total*) are reported to the right of each bar.

■ Control ■ Nab2-FLAG ■ Atx2-3xFLAG

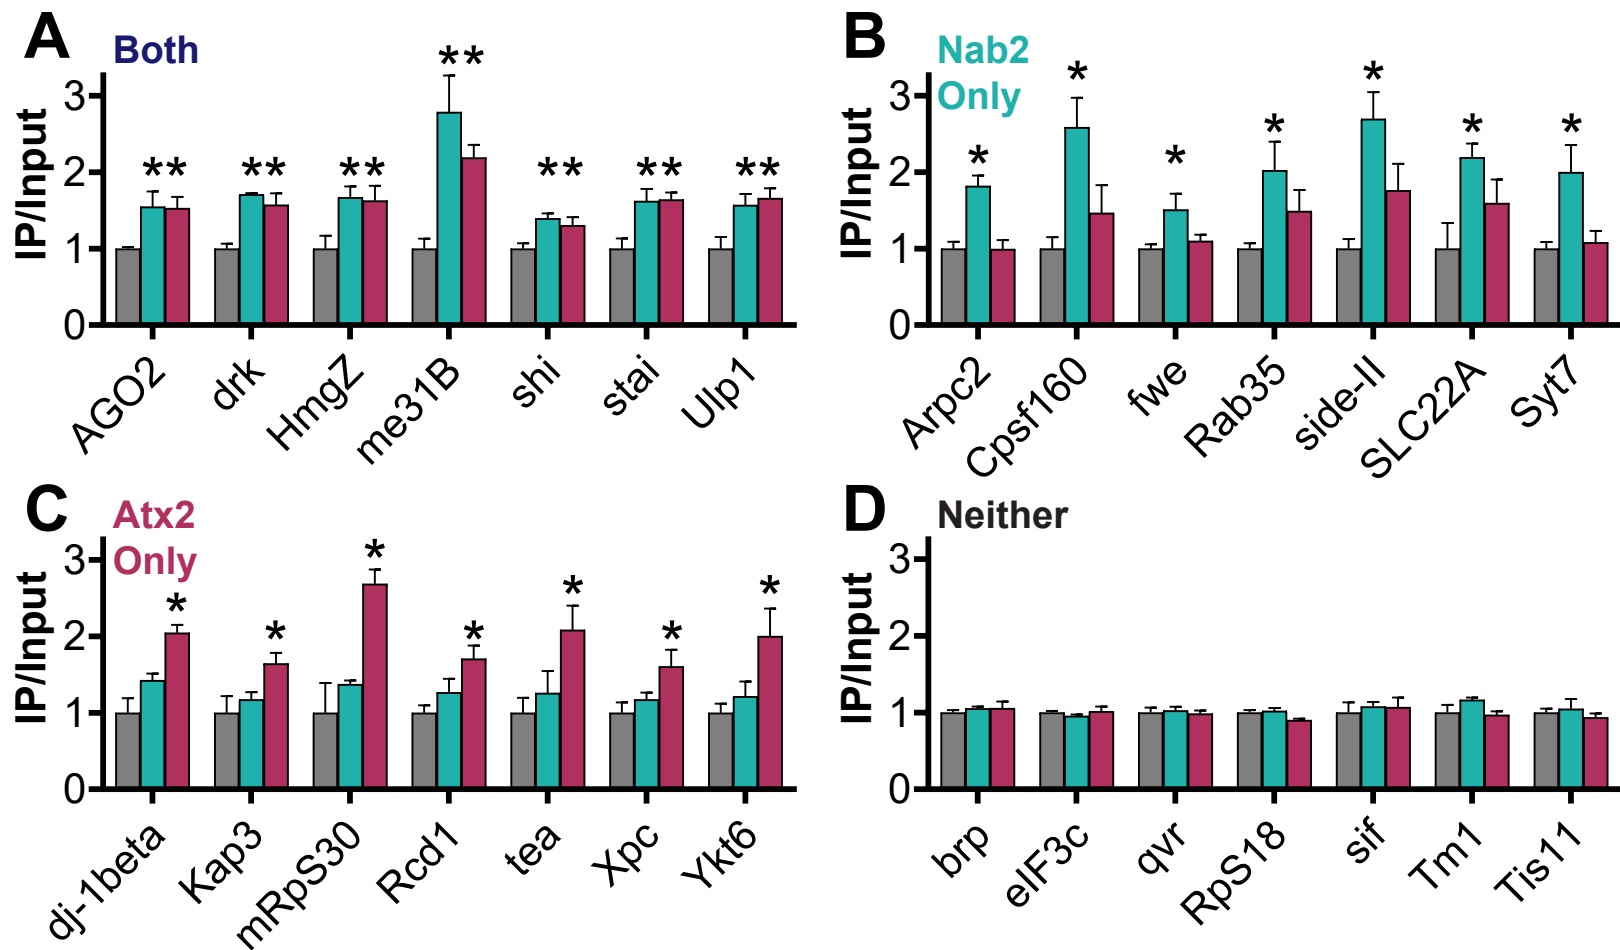

**Figure 5. Potential functionally important RNA targets of Nab2 and Atx2 identified by combining individual transcript and holistic GO analyses of RIP-Seq results.** For transcripts that associate with *Both* Nab2 and Atx2, *Nab2 Only*, *Atx2 Only*, or *Neither* RBP by RIP-Seq, seven transcripts of particular functional interest are presented as a summary of each category. (A-C) These transcripts met one or both of two criteria: 1) inclusion in an associated overrepresented GO term 2) an *IP/Input* (i.e. *Fold Enrichment*) value > 1.5. Given the functions of proteins encoded by these transcripts, these selections represent potential phenotypically important targets of post-transcriptional regulation by Nab2 and Atx2. (D) These transcripts, as a negative control, encode a functionally diverse set of proteins and do not associate with Nab2 or Atx2 (*Neither*), affirming the specificity of the RNA interactome of each RBP. Error bars represent standard errors of the mean (SEM). Gene-by-gene one-way ANOVA, Dunnett's post-hoc test, and within-gene multiple hypothesis testing adjustment (*Dun. Adj. p*) was used to assess statistical significance. \* = *Dun. Adj. p* < 0.05.



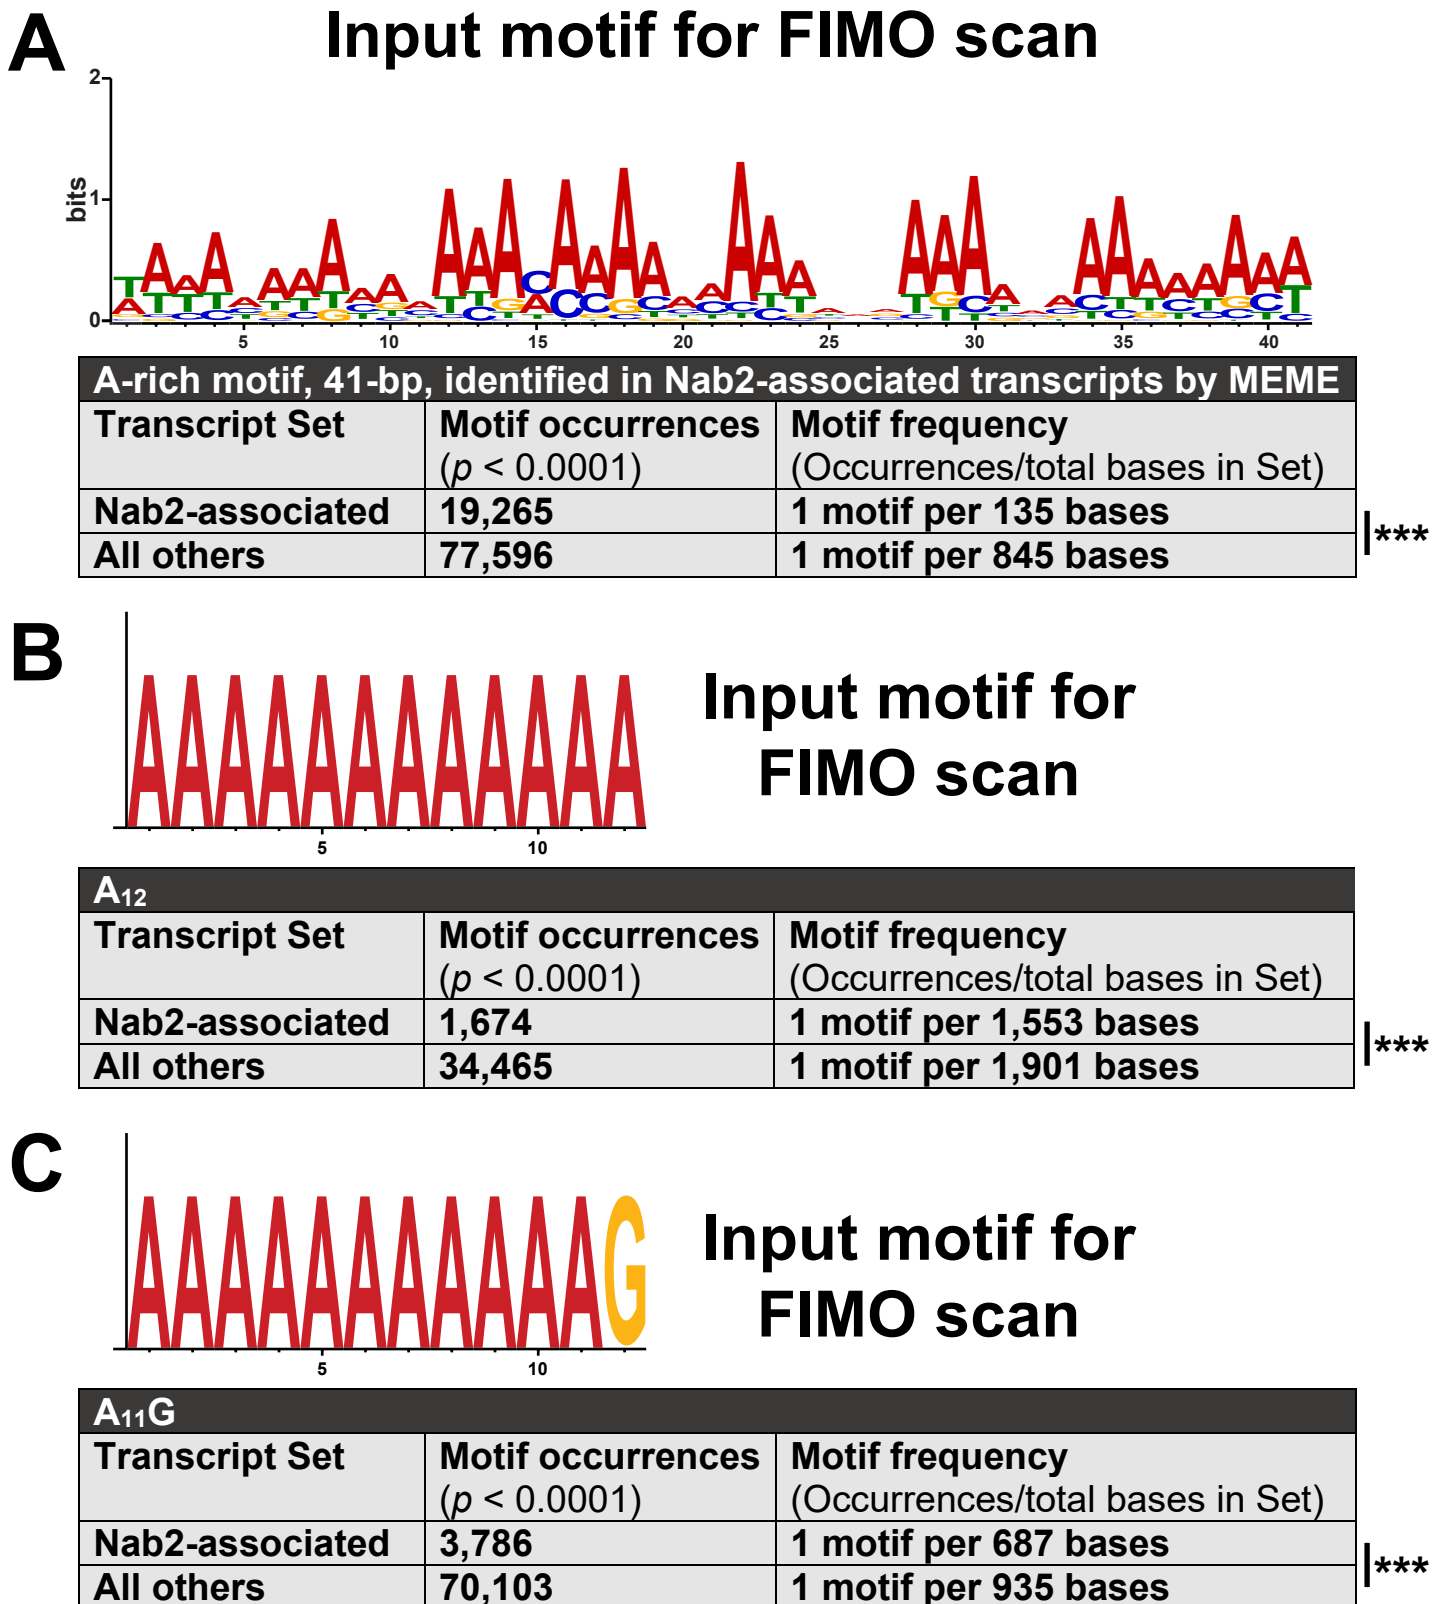

**Figure 6. A broad A-rich motif and two specific, canonical Nab2 binding motifs are enriched in Nab2-associated RNAs.** Output from transcript set scans by FIMO, which quantifies the occurrences in supplied sequence sets of motifs identical or highly similar to an input motif. Two transcript sets were scanned in each analysis: 1) all transcripts encoded by *Nab2-associated* gene models and 2) all transcripts encoded by *All others*, shorthand for all non-*Nab2-associated* gene models in the RIP-Seq testable set. (A) A 41-bp A-rich motif, identified by MEME as one of the first ten 6-50 bp motifs within *Nab2-associated* transcripts, was used as input for FIMO. (B) A canonical Nab2 binding motif from *S. cerevisiae*, A<sub>11</sub>G, was used as FIMO input. (C) A simple homopolymer stretch of A's for which Nab2 would have a very high affinity, A<sub>12</sub>, was used as FIMO input. In all three cases, particularly in (A), the scanned motif is significantly enriched in the *Nab2-associated* transcript set compared to the *All others* transcript set. However, none of the three input motifs are exclusive or nearly exclusive to Nab2-associated transcripts—each is still notably abundant within *All others*. Statistical significance was assessed using the chi-square test (two-sided). \*\*\*= $p < 0.001$ .

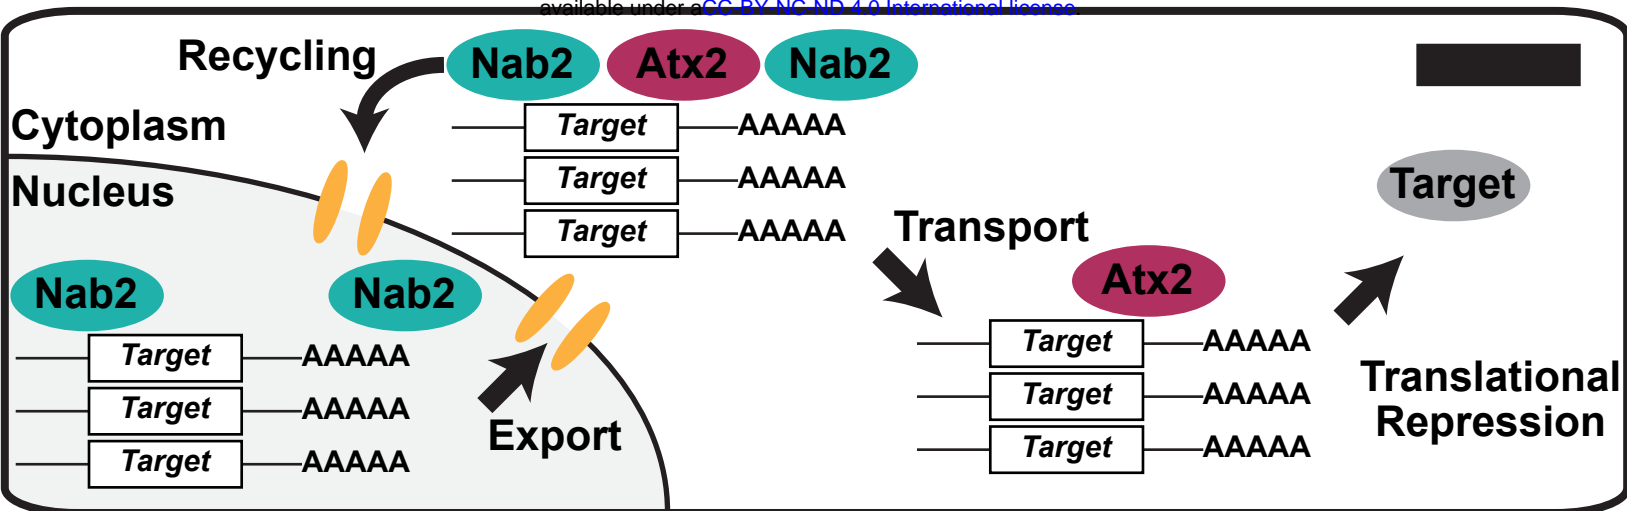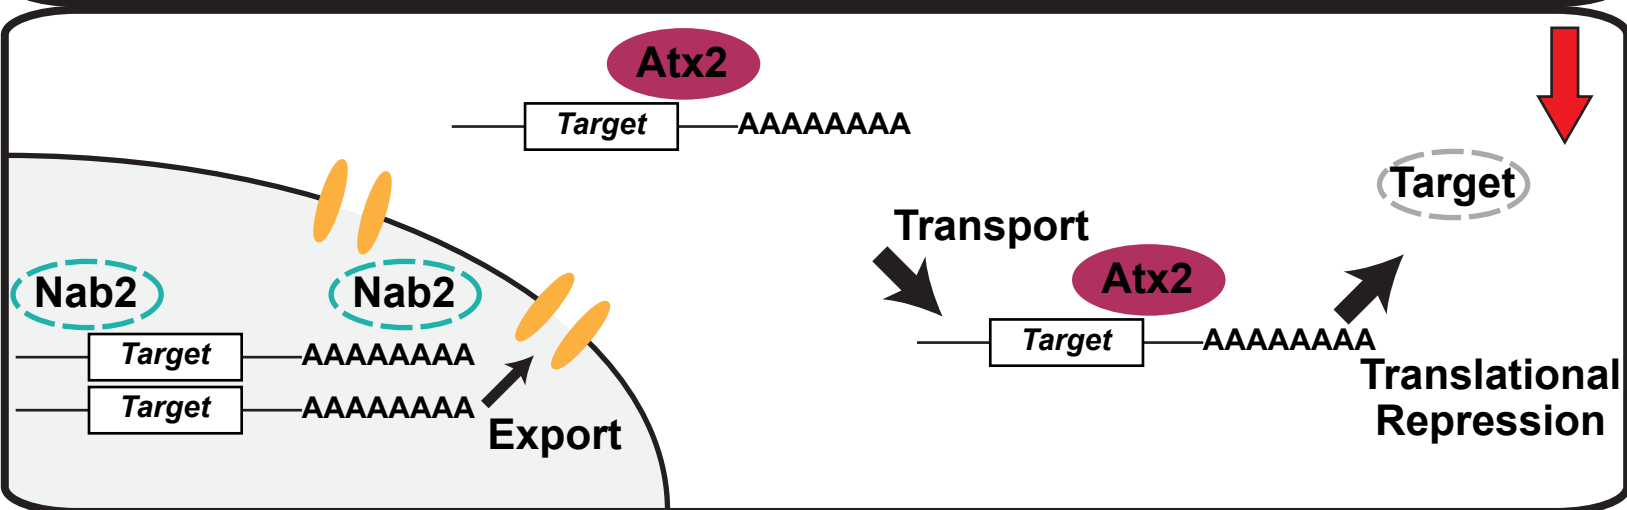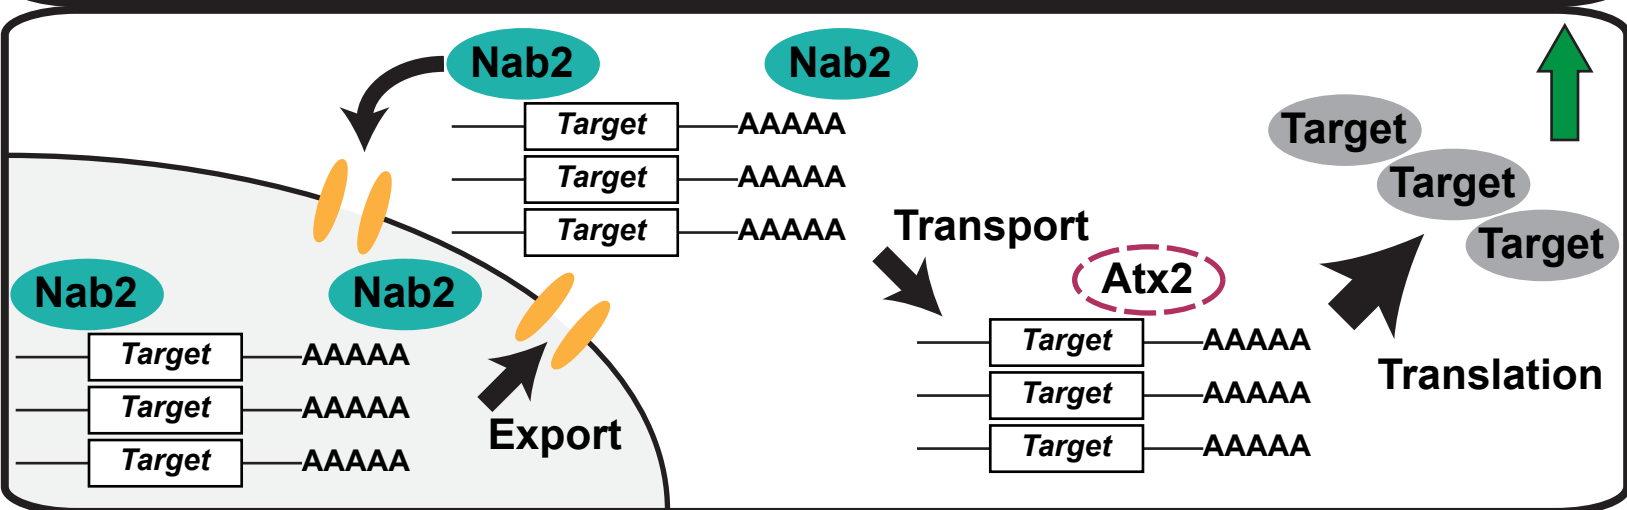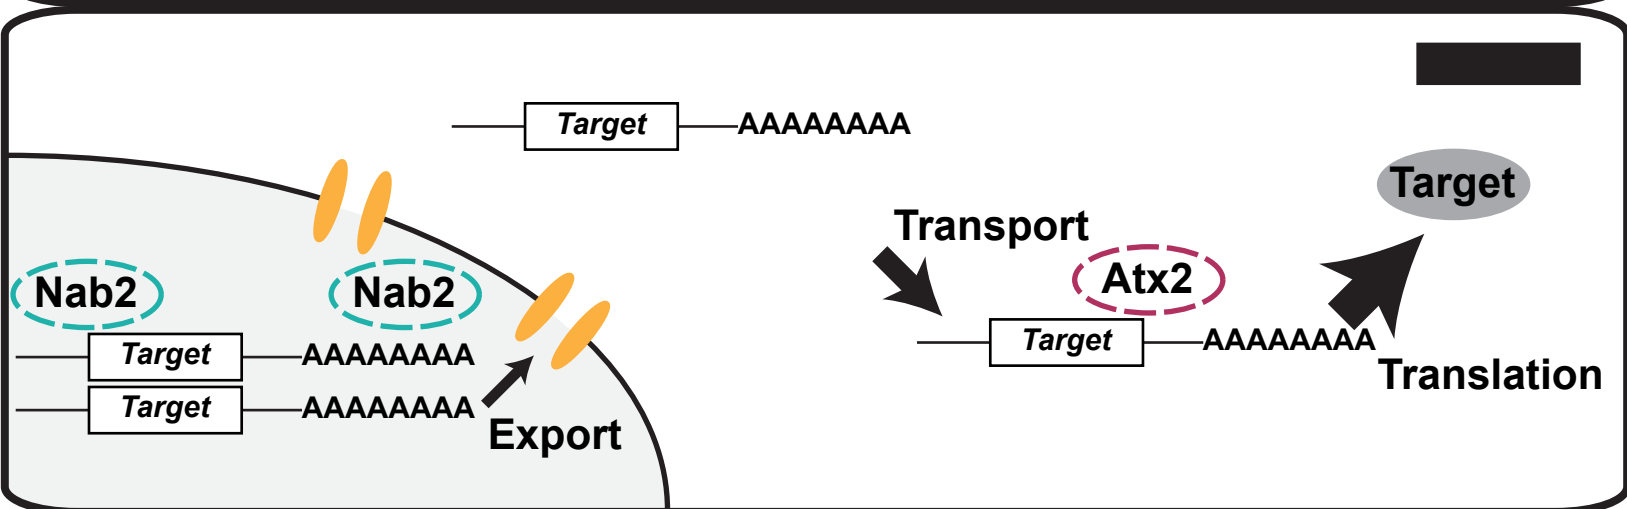

**Figure 7. A model of opposing regulatory roles for Nab2 and Atx2 on shared associated RNA transcripts.** Nab2 and Atx2 associate with a shared set of RNA transcripts in *Drosophila* brain neurons but primarily localize to separate subcellular compartments and weakly physically associate. *S. cerevisiae* Nab2 regulates nuclear processing, including transcript stability, poly(A) tail length, and export, across a broad RNA transcript set—*Drosophila* Nab2 may perform similar functions on its comparatively limited associated RNA set. Atx2 serves numerous roles in post-transcriptional regulation, including as a miRNA-machinery linked translational repressor. Taken together, these data imply the following model. (*Top*) In the wild-type condition, Nab2 protects transcripts from degradation, limits poly(A) tail length, and contributes to *Target* RNA export from the nucleus, shuttling with its associated transcripts into the cytoplasm. Nab2 and Atx2 may co-occupy the same transcripts briefly or occasionally during nuclear-cytoplasmic mRNP remodeling and prior to Nab2 recycling into the nucleus. Atx2 accompanies *Target* transcripts through transport to their destinations (e.g. synaptic terminals) and contributes to miRNA-mediated translational repression, which is released under certain conditions (e.g. synaptic activity), ultimately contributing to regulated production of wild-type levels of Target protein (black —). (*Second panel*) In *Nab2<sup>ex3</sup>* nulls, *Target* mRNAs are less stable, exhibit longer poly(A) tails, and are exported less efficiently from the nucleus. As a result, less *Target* mRNA reaches its appropriate destination, resulting in a decrease in steady-state levels of Target protein (red ↓). (*Third panel*) In *Atx2* loss-of-function heterozygotes (i.e. *Atx2<sup>DG08112/+</sup>* or *Atx2<sup>X1/+</sup>*), less Atx2 protein is expressed and available to repress *Target* translation, resulting in less responsive, higher steady-state levels of Target protein (green ↑). (*Bottom*) Effects of the complete loss of Nab2 in *Nab2<sup>ex3</sup>* and the decrease of functional Atx2 in *Atx2* loss-of-function heterozygotes balance one another. While nuclear *Target* mRNA is less stable and less is exported from the nucleus successfully, these RNAs are also under less strict translational control in partial absence of Atx2, ultimately resulting in Target protein levels and corresponding phenotypes more similar to the wild-type condition (black —). This model represents a prediction from our data and the published knowledge of the functions of each protein—it must be tested in future research, a task enabled by the identification of Nab2- and Atx2-associated transcripts in the current study.
